# Supplementary material for: Indole and indazole derivatives containing salicylaldimine as fluorescence materials for multi-stimuli response through assembling AIEgen in multiple states
Source: Royal Society of Chemistry journal article supplement (doi:10.1039/d4tc02038c), 2024-01-01
Supplement: d4tc02038c1.pdf [file d4tc02038c1.pdf]

## **Electronic Supporting Information**

### **Indole and indazole derivatives containing salicylaldehyde as fluorescence materials for multi-stimuli responsive through assembling AIEgen in multistate**

Haoran Hu, Lei Shi, Tongtong Jing, Chong Zhang, Chao Gao, Chengguo Sun, Yang Du and  
Bingcheng Hu

School of Chemical Engineering, Nanjing University of Science and Technology, Nanjing,  
Jiangsu 210094, China.

\* Corresponding author: E-mail address: E-mail: [hbc@njust.edu.cn](mailto:hbc@njust.edu.cn) (B. Hu).

## Experimental section

### Materials and methods

All used chemical reagents (analytical purity) were bought from reagent companies without further purification. The reactions were monitored by thin-layer chromatography (TLC) by silica gel GF<sub>254</sub>. Column chromatography was using the silica gel as stationary phase (200–300 mesh), ethyl acetate and petroleum ether were used as mobile phases. <sup>1</sup>H and <sup>13</sup>C NMR spectra were recorded on a 500 MHz (Bruker AVANCE III 500) and used DMSO-*d*<sub>6</sub> as solvents. UV/Vis absorption spectra were recorded by Thermo Scientific Evolution 350. Edinburgh Instruments FLS 1000 spectrometer was used to measure the fluorescent properties of title compounds and other complexes. TGA curves were obtained by a simultaneous thermal analyzer (Netzsch STA 449F5) and the dynamic light scattering (DLS) research was tested on a Malvern ZS90 instrument.

### Fluorescence properties of the title compounds

The compounds **3NC–7NC** were dissolved in dimethylsulfoxide (DMSO) and acetonitrile (CH<sub>3</sub>CN) respectively to prepare as stock solutions (1000 μM). These solutions were diluted by twentieth to obtain standard solution (50 μM), which were used to study the characteristics of the fluorescence emission and UV/Vis absorption spectra of the compounds in solvents. The Commission Internationale del'Eclairage (CIE) chromaticity coordinates were directly generated by the software Fluoracle Setup V2.12.1 with integrating sphere (slit widths: 1 nm/1 nm), besides the quantum yields (Φ<sub>f</sub>) were directly calculated by the same software with integrating sphere.

### Fluorescence and UV/Vis spectra analytical procedure of Cu<sup>2+</sup> ion recognition.

UV/Vis and fluorescence measurements were performed in a H<sub>2</sub>O/CH<sub>3</sub>CN (v/v, 95/5) solution containing the **4NC-3** (50 μM). The standard stock solutions (1 mM) were prepared by dissolving the appropriate amount metal salts of LiCl, NaCl, AgNO<sub>3</sub>, CoCl<sub>2</sub>, CuCl<sub>2</sub>, NiCl<sub>2</sub>, FeCl<sub>2</sub>, BaCl<sub>2</sub>, SnCl<sub>2</sub>, ZnCl<sub>2</sub>, CrCl<sub>3</sub>, Cd(NO<sub>3</sub>)<sub>3</sub>, Fe(NO<sub>3</sub>)<sub>3</sub>, Al<sub>2</sub>(SO<sub>4</sub><sup>2-</sup>)<sub>3</sub> in deionized water, and then these solutions were diluted by twentieth to obtain standard solution (50 μM) to use for titration.

### Preparation of the fluorescence PDMS (4NC-3-PDMS) films.

Preparation of the fluorescence molecule incorporated PDMS films (**4NC-3-PDMS**) was carried out using the commercially available Sylgard 184 silicone elastomer kit from Dow Inc. 10 mg **4NC-3** was dissolved in 1 mL acetone by ultrasound, which was mixed with Sylgard 184 silicone elastomer (10 g) evenly. Next, 1 mL curing agent (1 g) was poured into the PDMS and evenly spread on cleaned glass panels after uniform mixing, the resulting coated glass slides are then heated on a hot plate at 100 °C for 4 h, normal concentration resulting film was **4NC-3-PDMS** film with uniform composition. Aggregated state **4NC-3-PDMS** film was similar to the method, only increased the amount of added compounds to 50 mg with the other quantities remain unchanged.

### Theoretical calculations

The calculations were based on polarization function by Gaussian 09 suite of programs using b3lyp functional with 6–311G (d,p) with 20 states, Software Multiwfn and VMD were used for further analysis of calculation results and the visualization of highest occupied molecular orbital

(HOMO) and lowest unoccupied molecular orbital (LUMO).

## Synthesis

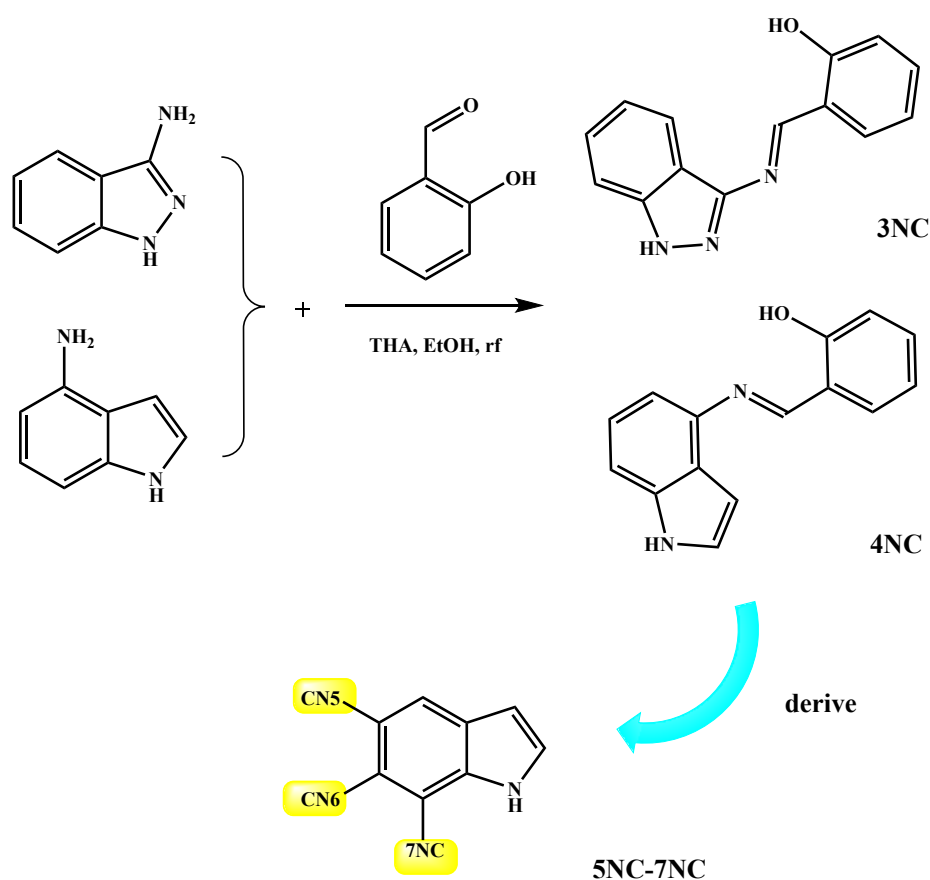

Scheme S1. Synthesis route and structure of title compounds 3NC-7NC.

### Synthesis of (E)-2-(((1H-indazol-3-yl)imino)methyl)phenol (3NC)

A solution of 1H-indol-3-amine (0.40 g, 3 mmol), salicylaldehyde (0.73 g, 6 mmol), and trifluoroacetic acid (TFA) with catalyst amount in anhydrous ethanol (50 mL) was stirred under reflux for 6 h. crude product was purified by silica column chromatography using ethyl acetate/petroleum ether (1/3, V/V) as mobile phase to give blackish green powder 3NC (0.54 g, 76%);  $^1\text{H NMR}$  (500 MHz,  $\text{DMSO-}d_6$ )  $\delta$  13.17 (s, 1H), 13.14 – 12.73 (s, 1H), 9.45 (s, 1H), 7.96 (d,  $J = 8.0$  Hz, 1H), 7.81 (d,  $J = 7.6$  Hz, 1H), 7.56 (d,  $J = 8.2$  Hz, 1H), 7.44 (t,  $J = 7.4$  Hz, 2H), 7.24 (t,  $J = 7.3$  Hz, 1H), 7.05 – 6.96 (m, 2H).  $^{13}\text{C NMR}$  (126 MHz,  $\text{DMSO-}d_6$ )  $\delta$  162.70, 160.69, 148.51, 142.01, 133.86, 132.94, 127.40, 121.87, 120.00, 119.84, 117.11, 116.78, 111.24; HRMS (ESI)  $m/z$  calcd for  $\text{C}_{14}\text{H}_{11}\text{N}_3\text{O}$   $[\text{M} + \text{H}]^+$  238.0975, found 238.0977.

### Synthesis of (E)-2-(((1H-indol-4-yl)imino)methyl)phenol (4NC)

A solution of 1H-indole-4-amine (0.39 g, 3 mmol), salicylaldehyde (0.73 g, 6 mmol), and trifluoroacetic acid (TFA) with catalyst amount in anhydrous ethanol (50 mL) was stirred under reflux for 6 h. crude product was purified by silica column chromatography using ethyl acetate/petroleum ether (1/3, V/V) as mobile phase to give bright yellow powder 4NC (0.56 g, 79%);  $^1\text{H NMR}$  (500 MHz,  $\text{DMSO-}d_6$ )  $\delta$  13.80 (s, 1H), 11.35 (s, 1H), 9.16 – 9.06 (m, 1H), 7.70 (d,

$J = 7.7$  Hz, 1H), 7.47 – 7.40 (m, 2H), 7.38 (d,  $J = 8.0$  Hz, 1H), 7.18 (t,  $J = 7.8$  Hz, 1H), 7.11 – 7.05 (m, 1H), 7.00 (dd,  $J = 7.6, 4.2$  Hz, 2H), 6.57 (s, 1H).  $^{13}\text{C}$  NMR (126 MHz,  $\text{DMSO-}d_6$ )  $\delta$  162.90, 161.09, 133.43, 132.96, 126.58, 123.30, 122.07, 119.99, 119.49, 117.09, 111.08, 109.04, 98.97; HRMS (ESI)  $m/z$  calcd for  $\text{C}_{15}\text{H}_{12}\text{N}_2\text{O}$   $[\text{M} + \text{H}]^+$  237.1023, found 237.1021.

#### Synthesis of (*E*)-2-(((1*H*-indol-5-yl)imino)methyl)phenol (5NC)

The synthetic route and purification method of 5NC was the same as that for 4NC, the ingredient 1*H*-indol-4-amine was replaced by 1*H*-indol-5-amin, and the consumptions was also the same.

Orange powder; yield: 0.57 g, 81%;  $^1\text{H}$  NMR (500 MHz,  $\text{DMSO-}d_6$ )  $\delta$  13.73 (s, 1H), 11.24 (s, 1H), 9.02 (s, 1H), 7.63 (d,  $J = 11.5$  Hz, 2H), 7.48 (d,  $J = 8.6$  Hz, 1H), 7.41 (t,  $J = 2.6$  Hz, 1H), 7.40 – 7.36 (m, 1H), 7.27 (dd,  $J = 8.6, 1.8$  Hz, 1H), 6.97 (t,  $J = 8.0$  Hz, 2H), 6.50 (s, 1H).  $^{13}\text{C}$  NMR (126 MHz,  $\text{DMSO-}d_6$ )  $\delta$  160.77, 160.74, 140.22, 135.73, 132.86, 132.67, 128.65, 127.23, 120.05, 119.39, 116.94, 115.76, 113.08, 112.57, 102.27; HRMS (ESI)  $m/z$  calcd for  $\text{C}_{15}\text{H}_{12}\text{N}_2\text{O}$   $[\text{M} + \text{H}]^+$  237.1023, found 237.1023.

#### Synthesis of (*E*)-2-(((1*H*-indol-6-yl)imino)methyl)phenol (6NC)

The synthetic route and purification method of 6NC was the same as that for 4NC, the ingredient 1*H*-indol-4-amine was replaced by 1*H*-indol-6-amin, and the consumptions was also the same.

Bright yellow powder; yield: 0.6 g, 85%;  $^1\text{H}$  NMR (500 MHz,  $\text{DMSO-}d_6$ )  $\delta$  13.64 (s, 1H), 11.25 (s, 1H), 10.24 – 10.18 (m, 1H), 9.04 (s, 1H), 7.65 (d,  $J = 7.6$  Hz, 1H), 7.61 (d,  $J = 8.4$  Hz, 1H), 7.47 (s, 1H), 7.42 – 7.41 (m, 1H), 7.41 – 7.37 (m, 1H), 7.19 (dd,  $J = 8.4, 1.5$  Hz, 1H), 6.98 (t,  $J = 7.9$  Hz, 2H), 6.48 (s, 1H).  $^{13}\text{C}$  NMR (126 MHz,  $\text{DMSO-}d_6$ )  $\delta$  161.29, 160.76, 142.11, 136.74, 133.04, 132.78, 127.66, 127.27, 121.14, 120.03, 119.44, 116.96, 113.57, 104.93, 101.83; HRMS (ESI)  $m/z$  calcd for  $\text{C}_{15}\text{H}_{12}\text{N}_2\text{O}$   $[\text{M} + \text{H}]^+$  237.1023, found 237.1027.

#### Synthesis of (*E*)-2-(((1*H*-indol-7-yl)imino)methyl)phenol (7NC)

The synthetic route and purification method of 7NC was the same as that for 4NC, the ingredient 1*H*-indol-4-amine was replaced by 1*H*-indol-7-amin, and the consumptions was also the same.

Orange powder; yield: 0.52 g, 73%;  $^1\text{H}$  NMR (500 MHz,  $\text{DMSO-}d_6$ )  $\delta$  12.74 (s, 1H), 11.41 (s, 1H), 9.06 (s, 1H), 7.73 (d,  $J = 7.6$  Hz, 1H), 7.51 (d,  $J = 6.9$  Hz, 1H), 7.45 (t,  $J = 7.7$  Hz, 1H), 7.36 (s, 1H), 7.11 – 7.05 (m, 2H), 7.01 (t,  $J = 7.1$  Hz, 2H), 6.52 (s, 1H).  $^{13}\text{C}$  NMR (126 MHz,  $\text{CDCl}_3$ )  $\delta$  162.75, 160.93, 133.89, 133.28, 132.45, 130.87, 129.37, 124.85, 120.44, 119.91, 119.52, 119.43, 117.19, 109.87, 103.13; HRMS (ESI)  $m/z$  calcd for  $\text{C}_{15}\text{H}_{12}\text{N}_2\text{O}$   $[\text{M} + \text{H}]^+$  237.1023, found 237.1026.

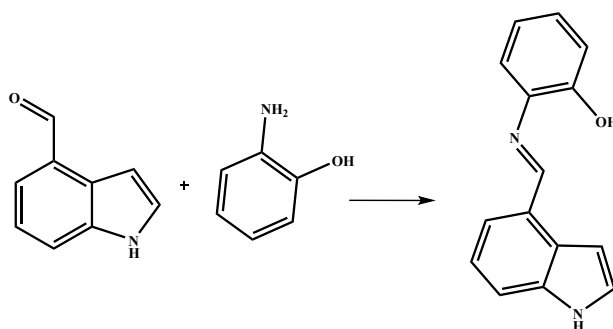

Scheme S2. The synthetic route of compound 4CN.

### Synthesis of (*E*)-2-(((1*H*-indol-4-yl)methylene)amino)phenol (**4CN**).

A solution of 1*H*-indole-4-carbaldehyde (0.44 g, 3 mmol), 2-aminophenol (0.65 g, 6 mmol), and trifluoroacetic acid (TFA) with catalyst amount in anhydrous ethanol (50 mL) was stirred under reflux for 6 h. crude product was purified by silica column chromatography using ethyl acetate/petroleum ether (1/3, V/V) as mobile phase to give orange powder **4CN** (0.47 g, 67%); <sup>1</sup>H NMR (500 MHz, DMSO-*d*<sub>6</sub>) δ 11.39 (s, 1H), 8.93 (s, 1H), 8.91 (s, 1H), 7.63 (d, *J* = 7.3 Hz, 1H), 7.59 (d, *J* = 8.0 Hz, 1H), 7.52 (t, *J* = 2.5 Hz, 1H), 7.29 (s, 1H), 7.23 (t, *J* = 7.3 Hz, 1H), 7.22 – 7.18 (m, 1H), 7.07 (t, *J* = 7.4 Hz, 1H), 6.93 (d, *J* = 7.9 Hz, 1H), 6.86 (t, *J* = 7.5 Hz, 1H). <sup>13</sup>C NMR (126 MHz, DMSO-*d*<sub>6</sub>) δ 160.76, 151.13, 139.91, 136.99, 127.99, 127.58, 127.07, 126.52, 123.21, 121.10, 120.04, 119.92, 116.34, 115.20, 102.26, 100.00; ; HRMS (ESI) *m/z* calcd for C<sub>15</sub>H<sub>12</sub>N<sub>2</sub>O [M + H]<sup>+</sup> 237.1023, found 237.1021.

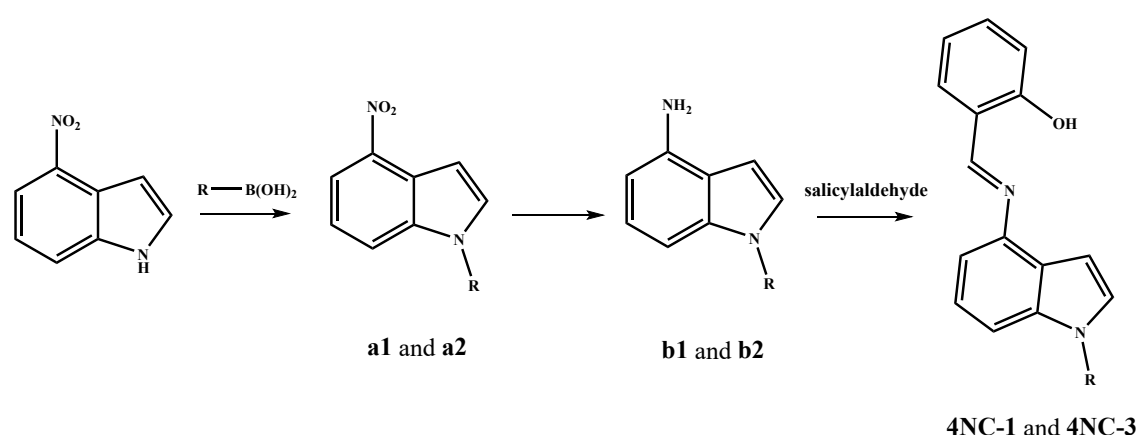

**a1**: R = phenyl; **a2**: R = TPA; **b1**: R = phenyl; **b2**: R = TPA

Scheme S3. The synthetic route of compound **4NC-1** and **4NC-3**.

### Synthesis of (*E*)-2-(((1-phenyl-1*H*-indol-4-yl)imino)methyl)phenol (**4NC-1**).

A mixture of 4-nitro-1*H*-indole (0.81 g, 5 mmol), cupric acetate hydrate (1.38 g, 7 mmol), and phenylboronic acid (1.22 g, 10 mmol) were added to 100 mL dichloromethane, and then 2 mL triethylamine was added dropwise to the solution, the reaction mixture was stirred for 24 h, filtration, concentrate the reaction solution, recrystallization of petroleum ether to obtain crude intermediate nitro substituted indole **a1**.

Subsequently, stirred intermediate **a1** in 30 mL ethanol, ammonium chloride (0.27 g, 5 mmol) in 10 mL distilled water was dropped in the system, the reaction mixture was heated to reflux and powdered zinc (0.97 g, 15 mmol) was added at reflux temperature. After 6 h the reaction monitored by TLC detection, the residue was extracted with ethyl acetate, and the combined extracts were washed with saturated brine, light yellow solid substituted indoleamine **b1** was obtained by removal of solvent. The comprehensive yield: 0.32 g, 31%.

The specific synthesis method of the compound **4NC-1** was the same as that of **4NC**, except that 1*H*-indol-4-amine was replaced with 1-phenyl-1*H*-indol-4-amine.

**4NC-1**: yellow powder; yield: 0.42 g, 91%; <sup>1</sup>H NMR (500 MHz, DMSO-*d*<sub>6</sub>) δ 13.58 (s, 1H), 9.16 (s, 1H), 7.74 (dd, *J* = 11.2, 4.9 Hz, 2H), 7.65 – 7.59 (m, 4H), 7.51 (d, *J* = 8.2 Hz, 1H), 7.45

(dd,  $J = 9.0, 4.9$  Hz, 2H), 7.30 (t,  $J = 7.9$  Hz, 1H), 7.24 – 7.19 (m, 1H), 7.04 – 6.98 (m, 2H), 6.81 (d,  $J = 3.1$  Hz, 1H).  $^{13}\text{C}$  NMR (126 MHz,  $\text{DMSO-}d_6$ )  $\delta$  163.72, 161.04, 141.19, 139.39, 136.72, 133.72, 133.07, 130.36, 129.77, 127.25, 124.70, 124.54, 123.60, 119.98, 119.62, 117.13, 110.16, 109.80, 101.24; HRMS (ESI)  $m/z$  calcd for  $\text{C}_{21}\text{H}_{16}\text{N}_2\text{O}$   $[\text{M} + \text{H}]^+$  313.1336, found 313.1339.

### Synthesis of (*E*)-2-(((1-(4-(diphenylamino)phenyl)-1H-indol-4-yl)imino)methyl)phenol (4NC-3).

The synthetic route was similar to that of 4NC-1, except phenylboronic acid was replaced by triphenylamine boronic acid. Comprehensive yield of the first two steps: 0.56 g, 29%.

**4NC-1:** yellow powder; yield: 0.58 g, 81%.  $^1\text{H}$  NMR (500 MHz,  $\text{DMSO-}d_6$ )  $\delta$  13.59 (s, 1H), 9.16 (s, 1H), 7.72 (dd,  $J = 8.4, 5.6$  Hz, 2H), 7.53 (d,  $J = 8.6$  Hz, 2H), 7.50 (d,  $J = 8.2$  Hz, 1H), 7.46 (t,  $J = 7.7$  Hz, 1H), 7.37 (t,  $J = 7.8$  Hz, 4H), 7.29 (t,  $J = 7.9$  Hz, 1H), 7.21 (d,  $J = 7.5$  Hz, 1H), 7.16 (d,  $J = 8.6$  Hz, 2H), 7.11 (t,  $J = 8.3$  Hz, 6H), 7.04 – 7.00 (m, 2H), 6.79 (d,  $J = 3.0$  Hz, 1H).  $^{13}\text{C}$  NMR (126 MHz,  $\text{CDCl}_3$ )  $\delta$  196.67, 161.68, 147.31, 147.20, 137.06, 136.75, 133.79, 129.45, 129.41, 128.57, 125.48, 125.19, 123.85, 123.62, 121.67, 121.03, 120.98, 120.72, 119.91, 117.94, 117.84, 117.67, 103.47; HRMS (ESI)  $m/z$  calcd for  $\text{C}_{33}\text{H}_{25}\text{N}_3\text{O}$   $[\text{M} + \text{H}]^+$  480.2071, found 480.2073.

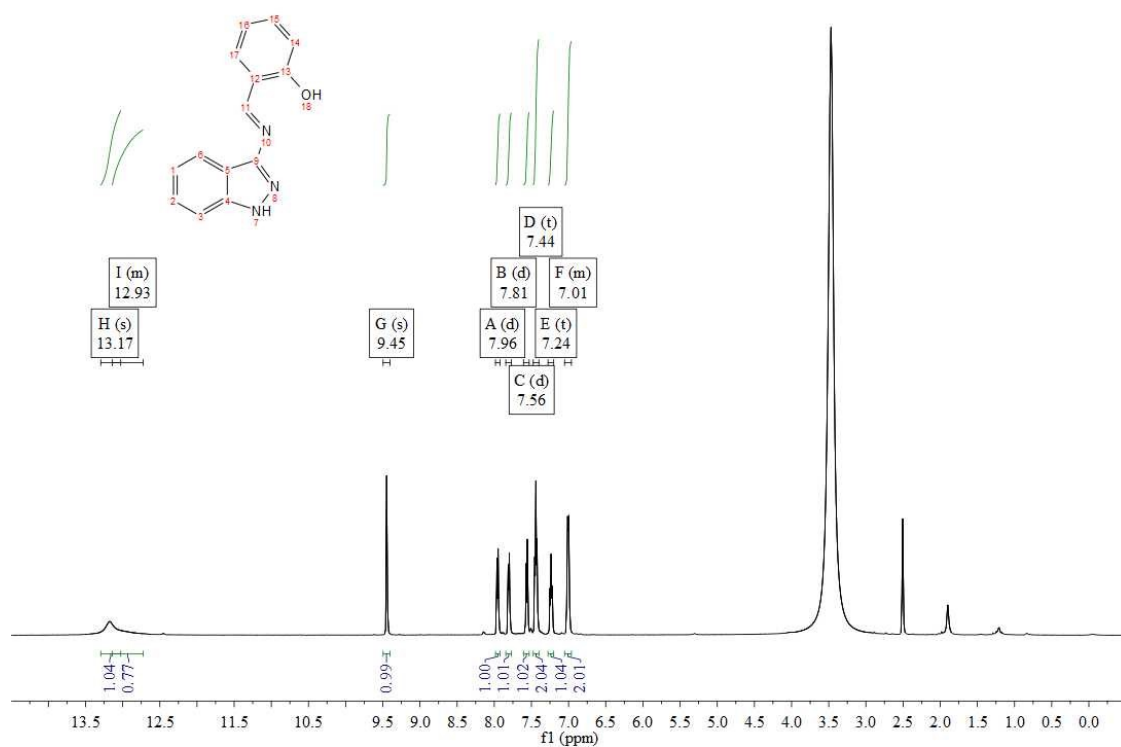

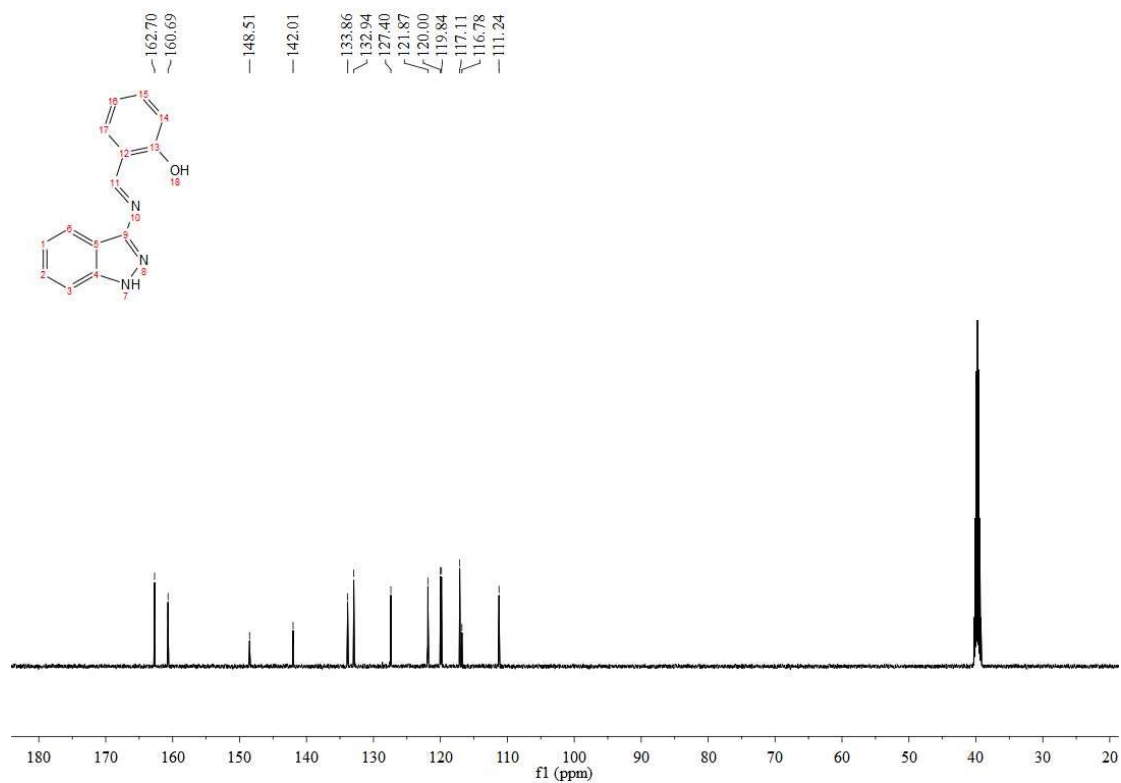

Figure S2.  $^{13}\text{C}$  NMR spectrum of compound 3NC.

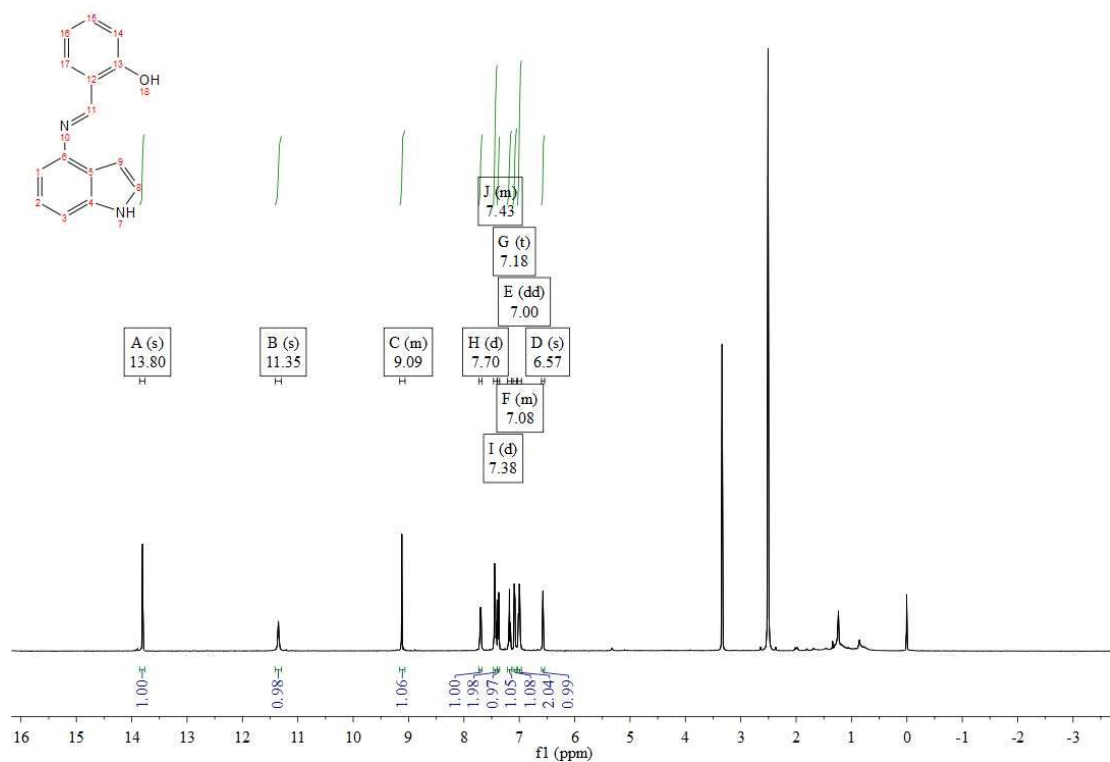

Figure S3.  $^1\text{H}$  NMR spectrum of compound 4NC.

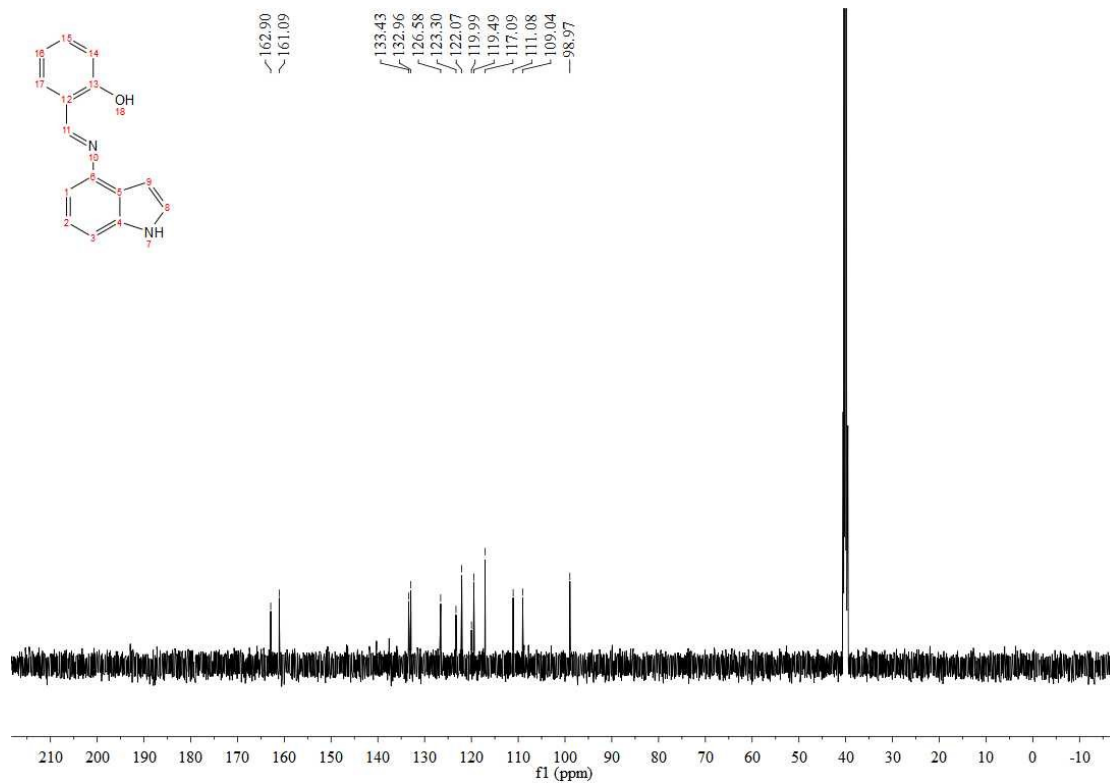

Figure S4.  $^{13}\text{C}$  NMR spectrum of compound 4NC.

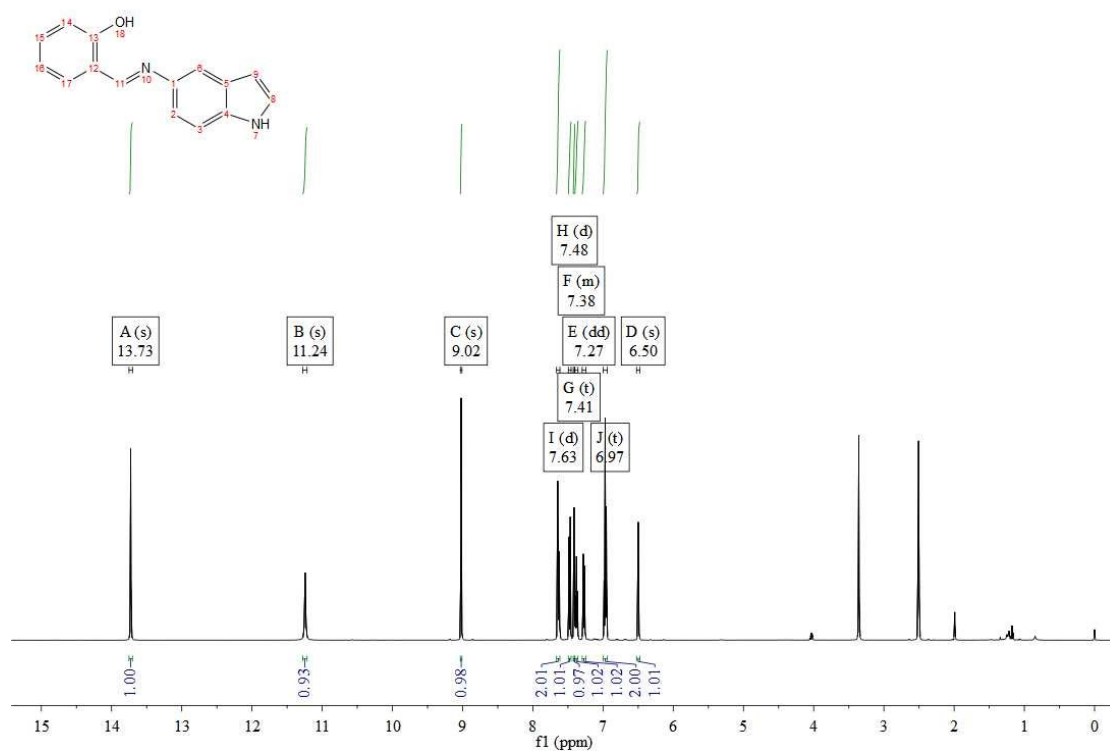

Figure S5.  $^1\text{H}$  NMR spectrum of compound 5NC.



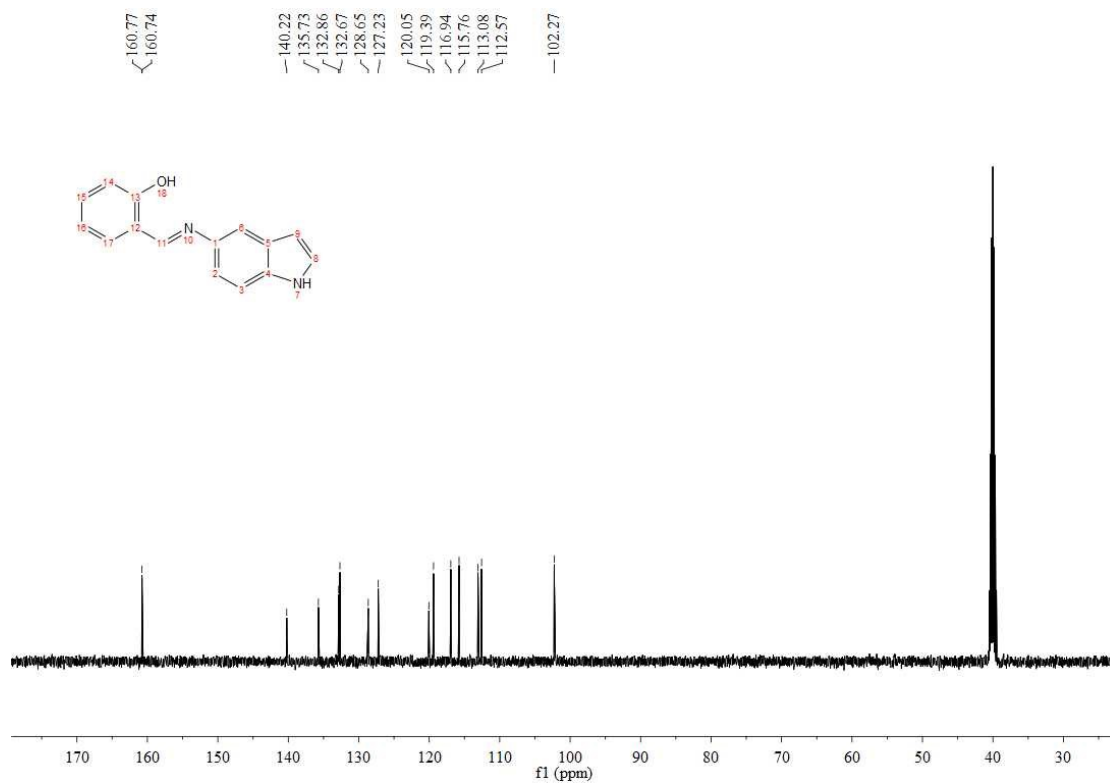

Figure S6. <sup>13</sup>C NMR spectrum of compound 5NC.

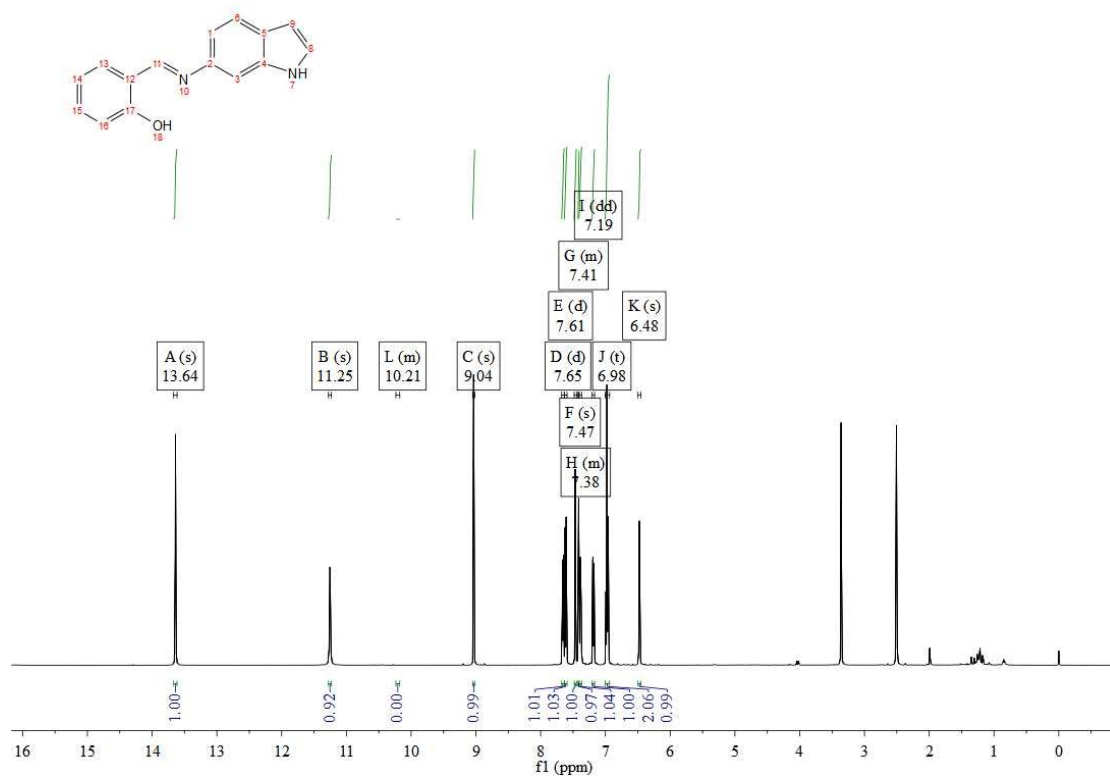

Figure S7. <sup>1</sup>H NMR spectrum of compound 6NC.

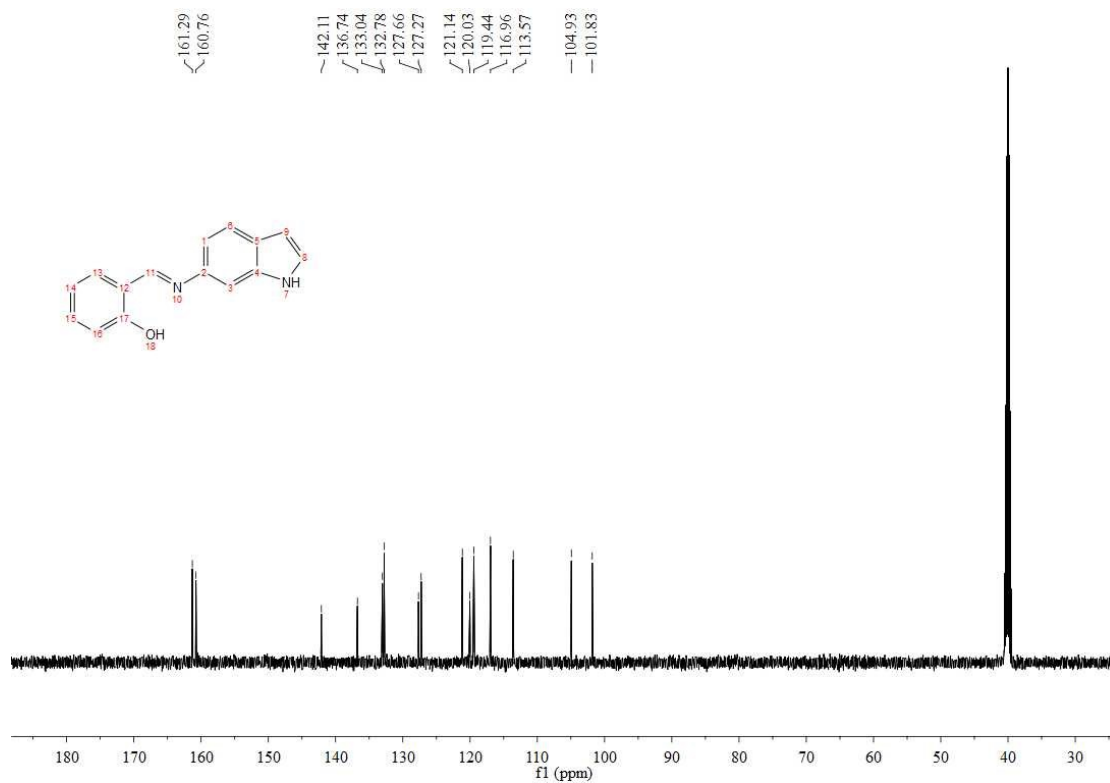

Figure S8.  $^{13}\text{C}$  NMR spectrum of compound 6NC.

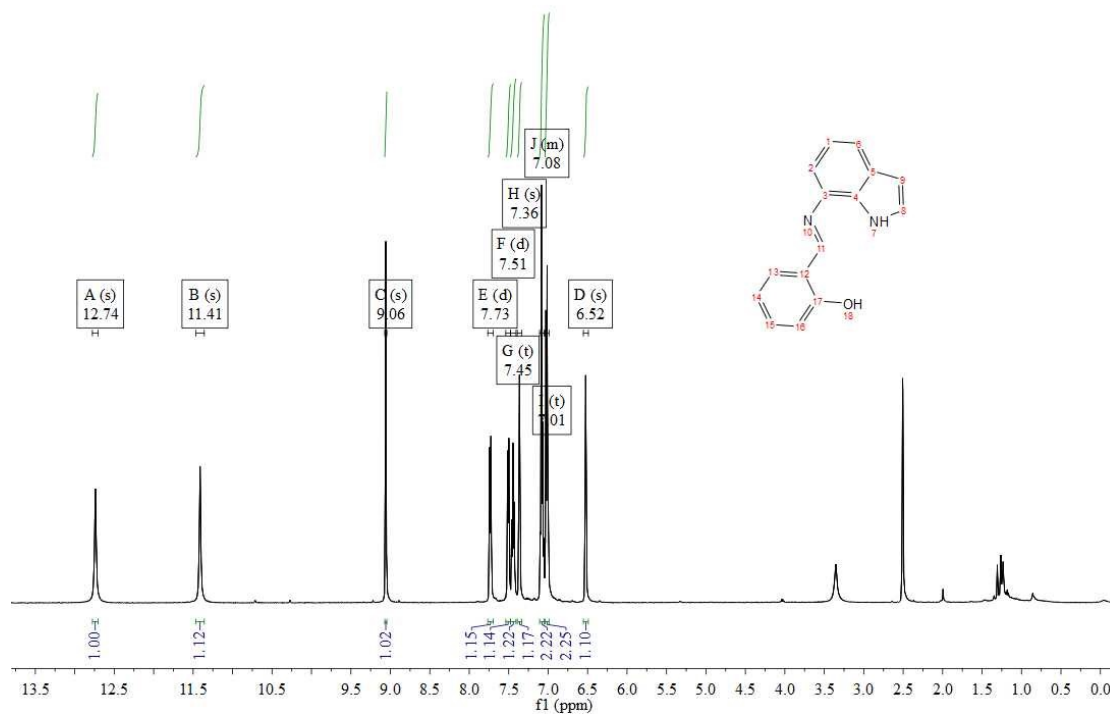

Figure S9.  $^1\text{H}$  NMR spectrum of compound 7NC.

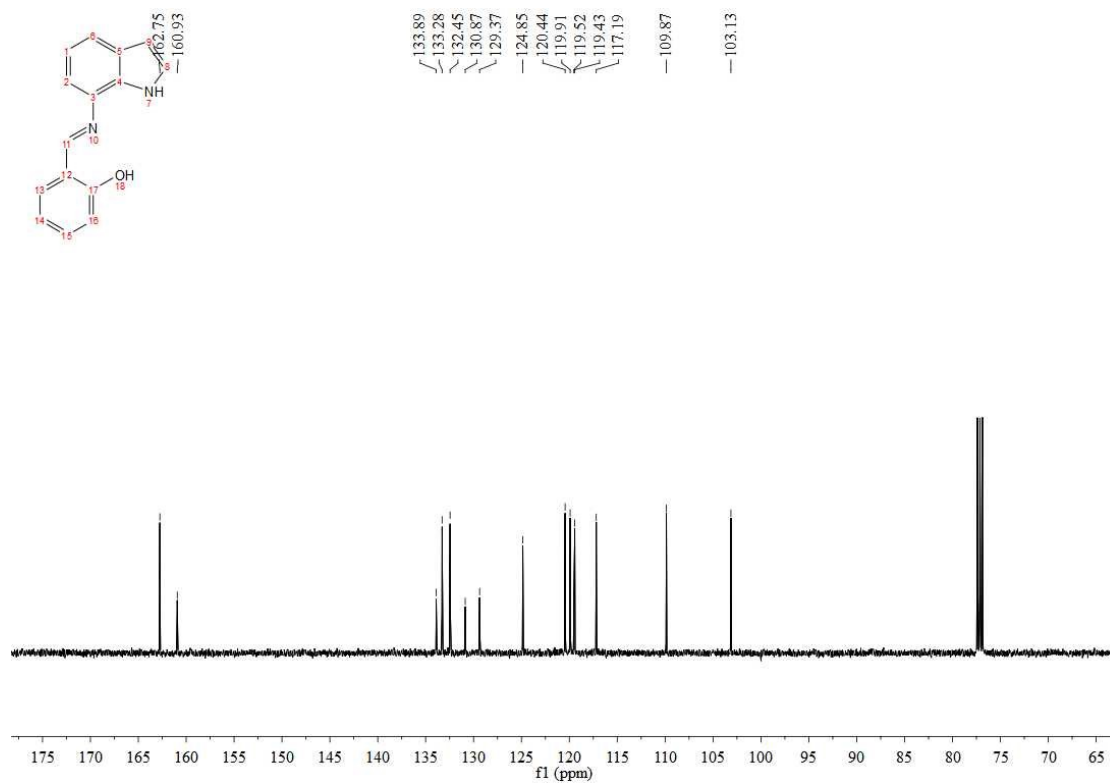

Figure S10.  $^{13}\text{C}$  NMR spectrum of compound 7NC.

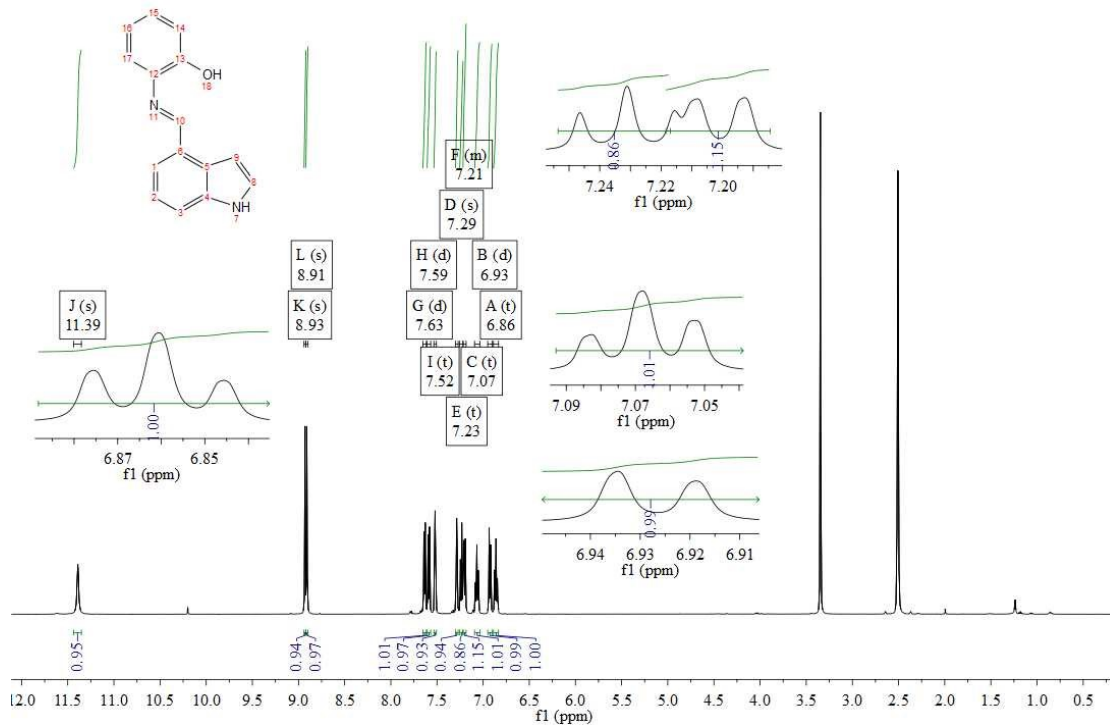

Figure S11.  $^1\text{H}$  NMR spectrum of compound 4CN.

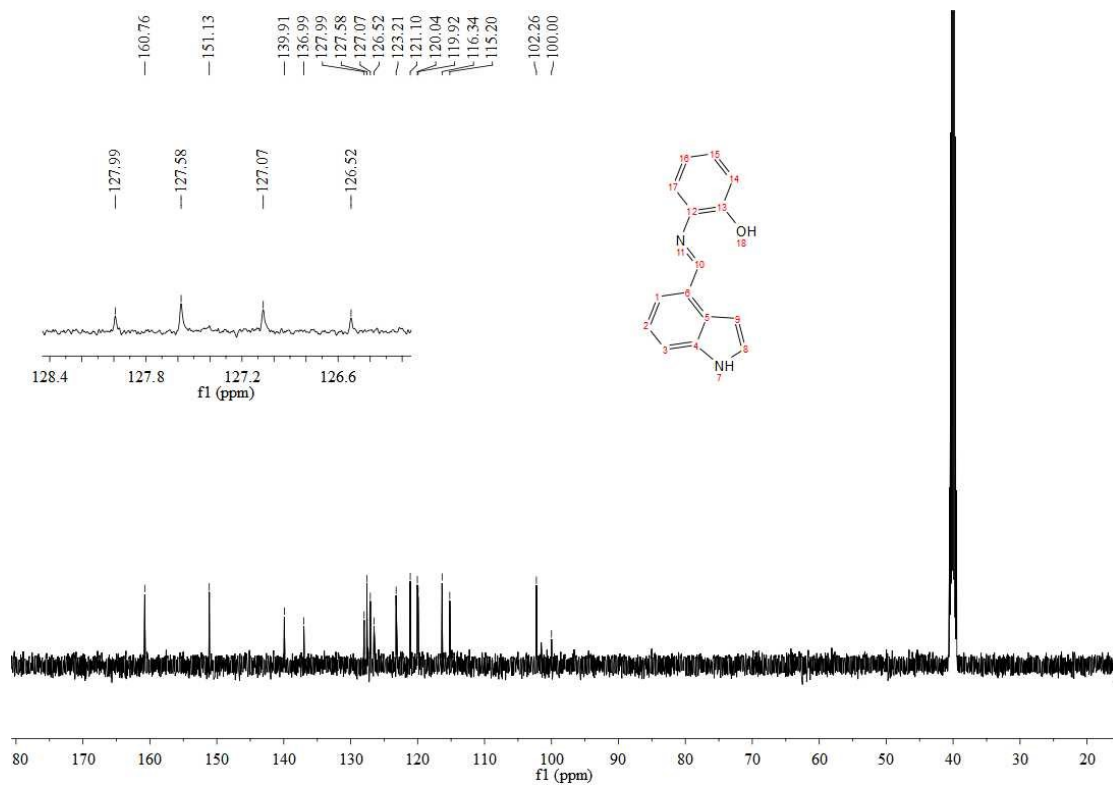

Figure S12.  $^{13}\text{C}$  NMR spectrum of compound 4CN.

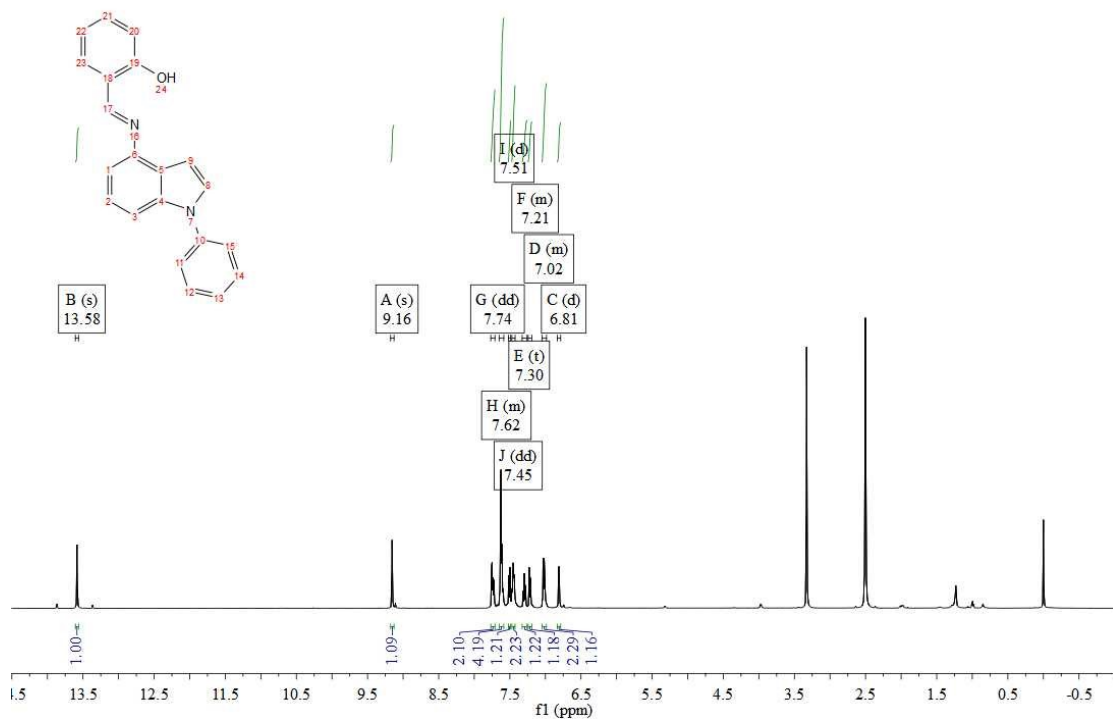

Figure S13.  $^1\text{H}$  NMR spectrum of compound 4NC-1.

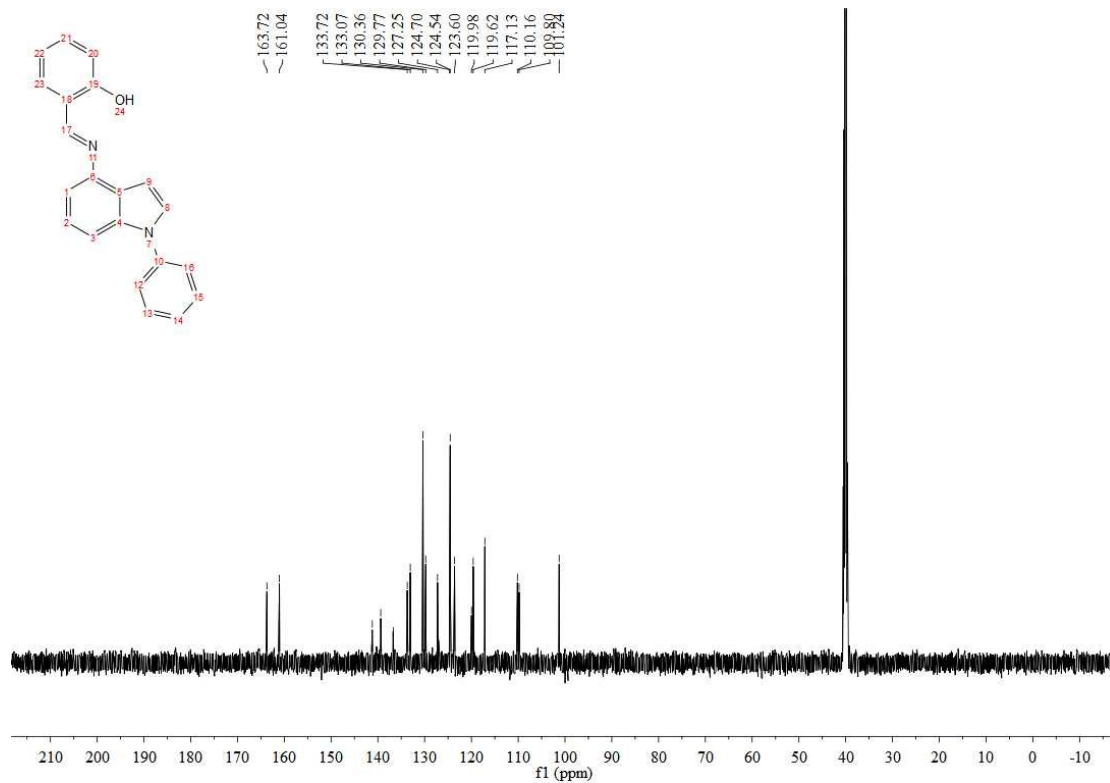

Figure S14.  $^{13}\text{C}$  NMR spectrum of compound 4NC-1.

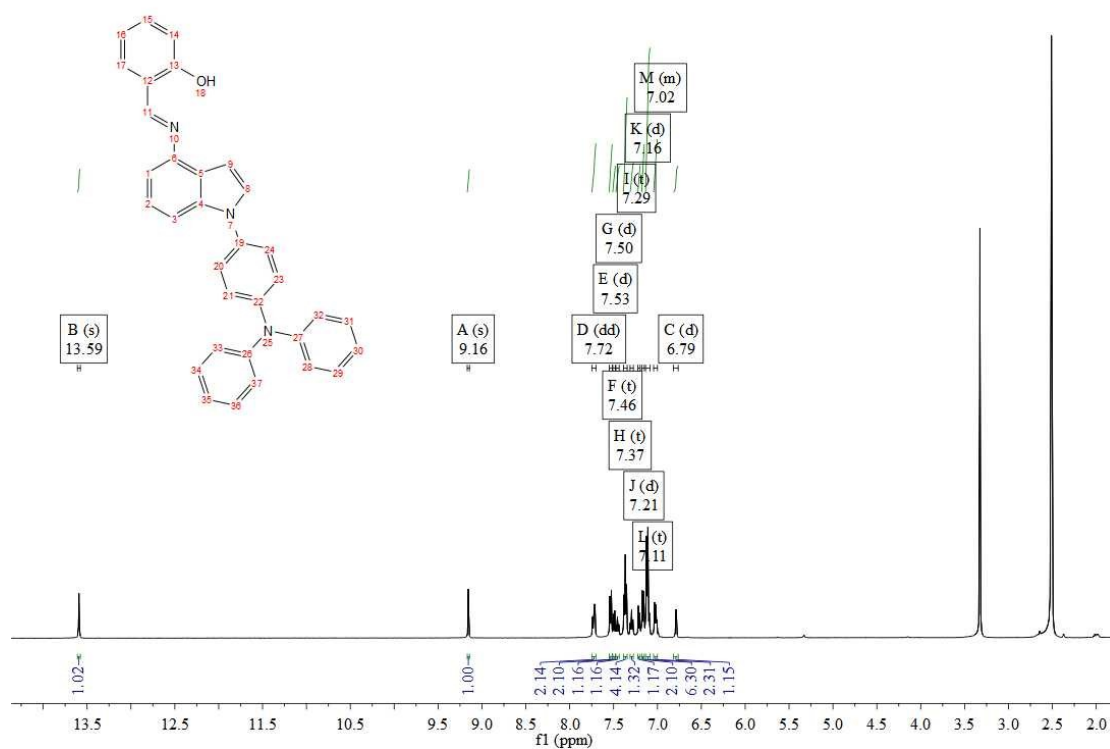

Figure S15.  $^1\text{H}$  NMR spectrum of compound 4NC-3.

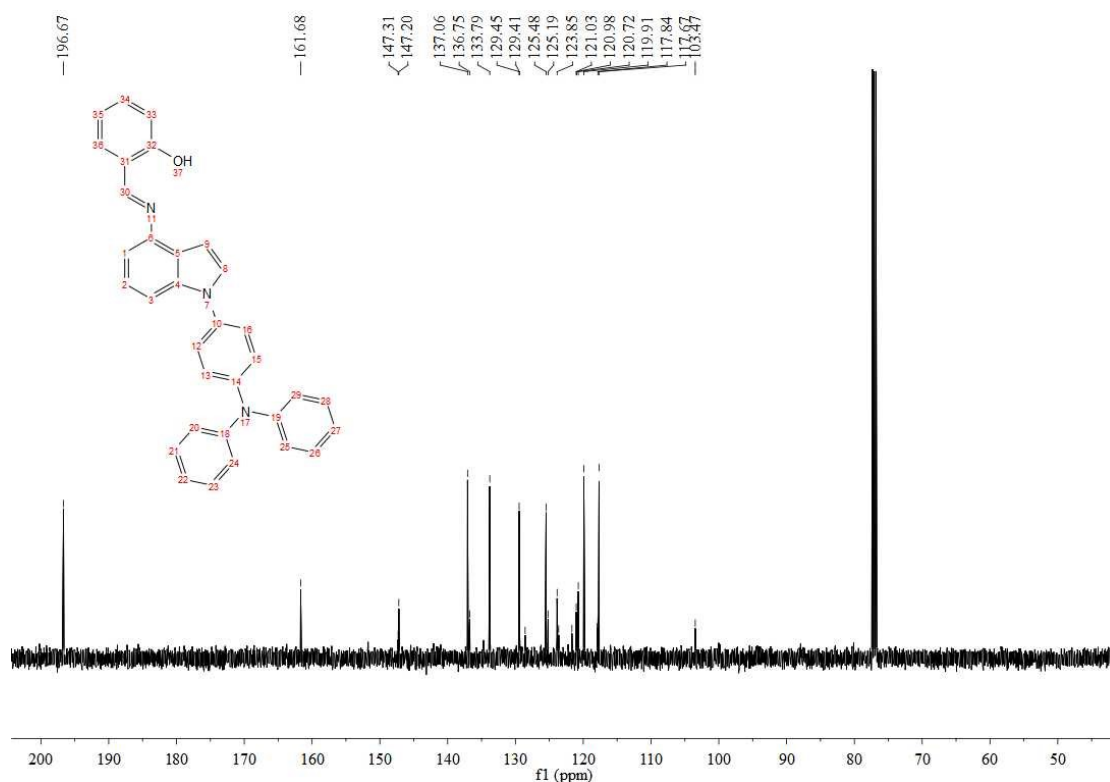

Figure S16.  $^{13}\text{C}$  NMR spectrum of compound 4NC-3.

Table S1. Crystal data and structure refinement for compound 3NC (CCDC number: 2308721).

|                                  |                                                |
|----------------------------------|------------------------------------------------|
| Identification code              | cu_20230922_YS_NLG_HHR_3_0m                    |
| Empirical formula                | $\text{C}_{14}\text{H}_{11}\text{N}_3\text{O}$ |
| Formula weight                   | 237.26                                         |
| Temperature/K                    | 193.00                                         |
| Crystal system                   | trigonal                                       |
| Space group                      | $P3_2$                                         |
| $a/\text{\AA}$                   | 13.6284(3)                                     |
| $b/\text{\AA}$                   | 13.6284(3)                                     |
| $c/\text{\AA}$                   | 5.4093(2)                                      |
| $\alpha/^\circ$                  | 90                                             |
| $\beta/^\circ$                   | 90                                             |
| $\gamma/^\circ$                  | 120                                            |
| Volume/ $\text{\AA}^3$           | 870.08(5)                                      |
| Z                                | 3                                              |
| $\rho_{\text{calc}}/\text{cm}^3$ | 1.358                                          |
| $\mu/\text{mm}^{-1}$             | 0.720                                          |
| F(000)                           | 372.0                                          |
| Crystal size/ $\text{mm}^3$      | $0.15 \times 0.07 \times 0.06$                 |

|                                                  |                                                                  |
|--------------------------------------------------|------------------------------------------------------------------|
| Radiation                                        | CuK $\alpha$ ( $\lambda = 1.54178$ )                             |
| 2 $\Theta$ range for data collection/ $^{\circ}$ | 7.49 to 136.376                                                  |
| Index ranges                                     | $-15 \leq h \leq 16$ , $-16 \leq k \leq 16$ , $-6 \leq l \leq 5$ |
| Reflections collected                            | 7186                                                             |
| Independent reflections                          | 1906 [ $R_{\text{int}} = 0.0647$ , $R_{\text{sigma}} = 0.0471$ ] |
| Data/restraints/parameters                       | 1906/1/164                                                       |
| Goodness-of-fit on $F^2$                         | 1.017                                                            |
| Final R indexes [ $I \geq 2\sigma(I)$ ]          | $R_1 = 0.0333$ , $wR_2 = 0.0723$                                 |
| Final R indexes [all data]                       | $R_1 = 0.0447$ , $wR_2 = 0.0762$                                 |
| Largest diff. peak/hole / $e \text{ \AA}^{-3}$   | 0.12/-0.15                                                       |
| Flack parameter                                  | -0.1(3)                                                          |

Table S2. Crystal data and structure refinement for compound **6NC** (CCDC number: 2308722).

|                                                  |                                                                  |
|--------------------------------------------------|------------------------------------------------------------------|
| Identification code                              | mo_20230922_YS_NLG_HHR_6_0m                                      |
| Empirical formula                                | C <sub>15</sub> H <sub>12</sub> N <sub>2</sub> O                 |
| Formula weight                                   | 236.27                                                           |
| Temperature/K                                    | 193.00                                                           |
| Crystal system                                   | monoclinic                                                       |
| Space group                                      | P2 <sub>1</sub> /c                                               |
| a/ $\text{\AA}$                                  | 14.3901(6)                                                       |
| b/ $\text{\AA}$                                  | 5.6092(3)                                                        |
| c/ $\text{\AA}$                                  | 15.9163(6)                                                       |
| $\alpha/^{\circ}$                                | 90                                                               |
| $\beta/^{\circ}$                                 | 115.169(2)                                                       |
| $\gamma/^{\circ}$                                | 90                                                               |
| Volume/ $\text{\AA}^3$                           | 1162.74(9)                                                       |
| Z                                                | 4                                                                |
| $\rho_{\text{calc}}/\text{cm}^3$                 | 1.350                                                            |
| $\mu/\text{mm}^{-1}$                             | 0.087                                                            |
| F(000)                                           | 496.0                                                            |
| Crystal size/ $\text{mm}^3$                      | 0.13 $\times$ 0.11 $\times$ 0.1                                  |
| Radiation                                        | MoK $\alpha$ ( $\lambda = 0.71073$ )                             |
| 2 $\Theta$ range for data collection/ $^{\circ}$ | 5.656 to 55.002                                                  |
| Index ranges                                     | $-18 \leq h \leq 17$ , $-7 \leq k \leq 7$ , $-20 \leq l \leq 18$ |
| Reflections collected                            | 12070                                                            |
| Independent reflections                          | 2645 [ $R_{\text{int}} = 0.0602$ , $R_{\text{sigma}} = 0.0444$ ] |
| Data/restraints/parameters                       | 2645/0/164                                                       |
| Goodness-of-fit on $F^2$                         | 1.042                                                            |
| Final R indexes [ $I \geq 2\sigma(I)$ ]          | $R_1 = 0.0451$ , $wR_2 = 0.1090$                                 |
| Final R indexes [all data]                       | $R_1 = 0.0639$ , $wR_2 = 0.1232$                                 |

---

Largest diff. peak/hole / e Å<sup>-3</sup> 0.23/-0.16

---

Table S3. Crystal data and structure refinement for compound **7NC** (CCDC number: 2308723).

|                                             |                                                               |
|---------------------------------------------|---------------------------------------------------------------|
| Identification code                         | mo_20230922_YS_NLG_HHR_7_0m                                   |
| Empirical formula                           | C <sub>15</sub> H <sub>12</sub> N <sub>2</sub> O              |
| Formula weight                              | 236.27                                                        |
| Temperature/K                               | 193.00                                                        |
| Crystal system                              | monoclinic                                                    |
| Space group                                 | Cc                                                            |
| a/Å                                         | 8.3409(5)                                                     |
| b/Å                                         | 21.7821(13)                                                   |
| c/Å                                         | 7.6787(5)                                                     |
| α/°                                         | 90                                                            |
| β/°                                         | 120.072(2)                                                    |
| γ/°                                         | 90                                                            |
| Volume/Å <sup>3</sup>                       | 1207.30(13)                                                   |
| Z                                           | 4                                                             |
| ρ <sub>calc</sub> /cm <sup>3</sup>          | 1.300                                                         |
| μ/mm <sup>-1</sup>                          | 0.083                                                         |
| F(000)                                      | 496.0                                                         |
| Crystal size/mm <sup>3</sup>                | 0.13 × 0.12 × 0.1                                             |
| Radiation                                   | MoKα (λ = 0.71073)                                            |
| 2θ range for data collection/°              | 7.484 to 50.706                                               |
| Index ranges                                | -10 ≤ h ≤ 10, -26 ≤ k ≤ 26, -9 ≤ l ≤ 9                        |
| Reflections collected                       | 8497                                                          |
| Independent reflections                     | 1999 [R <sub>int</sub> = 0.0489, R <sub>sigma</sub> = 0.0420] |
| Data/restraints/parameters                  | 1999/2/164                                                    |
| Goodness-of-fit on F <sup>2</sup>           | 1.067                                                         |
| Final R indexes [I ≥ 2σ(I)]                 | R <sub>1</sub> = 0.0343, wR <sub>2</sub> = 0.0797             |
| Final R indexes [all data]                  | R <sub>1</sub> = 0.0362, wR <sub>2</sub> = 0.0814             |
| Largest diff. peak/hole / e Å <sup>-3</sup> | 0.13/-0.14                                                    |
| Flack parameter                             | -1.0(7)                                                       |

---

Table S4. Quantum yields of synthesized compounds in solid. <sup>a</sup>

| Comp.               | <b>4CN</b>     | <b>3NC</b> | <b>4NC</b> | <b>5NC</b> | <b>6NC</b> | <b>7NC</b>     | <b>4NC-1</b> | <b>4NC-3</b> |
|---------------------|----------------|------------|------------|------------|------------|----------------|--------------|--------------|
| QY(Φ <sub>f</sub> ) | — <sup>b</sup> | 0.17       | 0.19       | 0.31       | 0.20       | — <sup>b</sup> | 0.21         | 0.37         |

---

<sup>a</sup> The quantum yields (Φ<sub>f</sub>) were directly calculated by the same software with integrating sphere.

<sup>b</sup> Basically, compounds **4CN** and **7NC** without fluorescence emission properties.



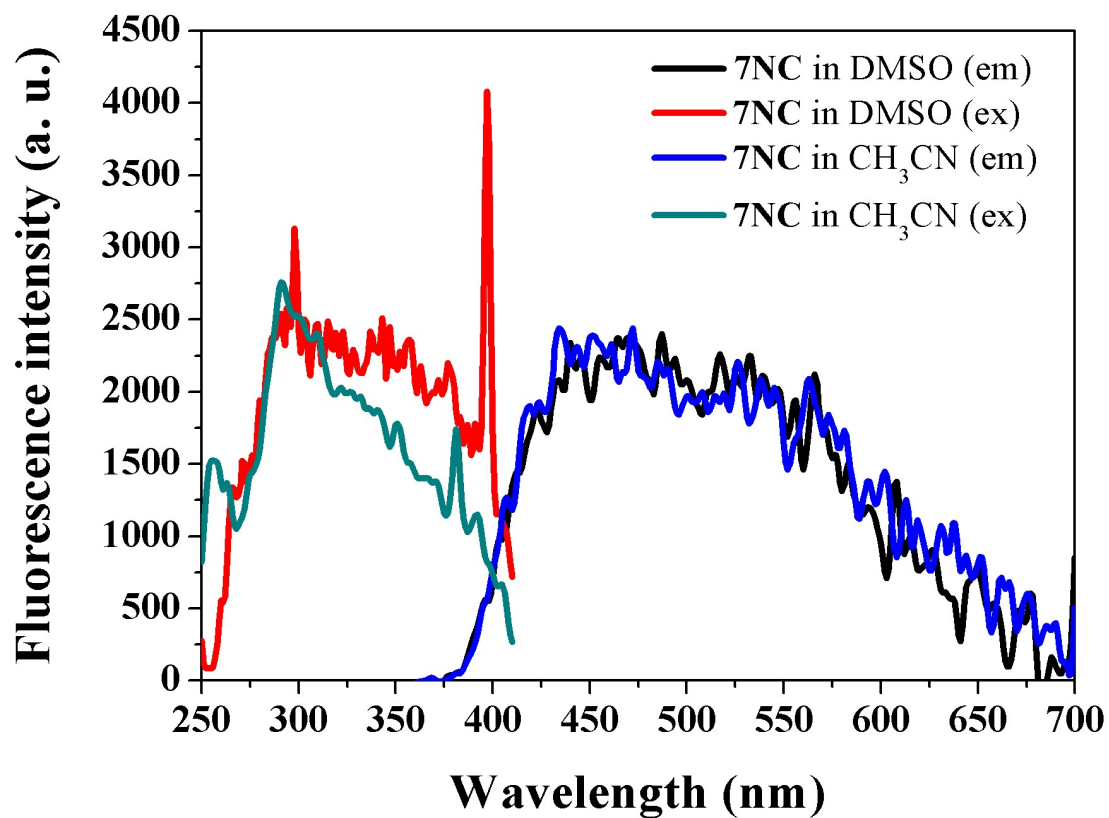

Figure S17. Fluorescence spectra of compound 7NC in solutions (50  $\mu\text{M}$ ).

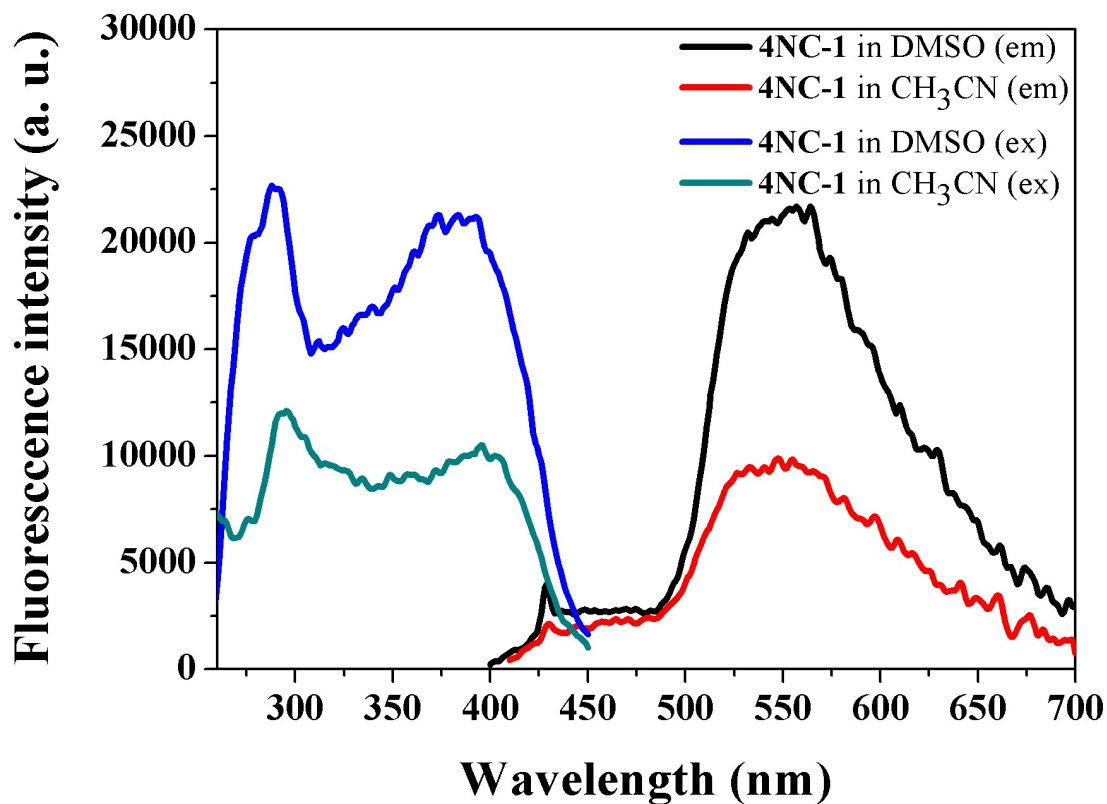

Figure S18. Fluorescence spectra of compound 4NC-1 in solutions (50  $\mu\text{M}$ ).

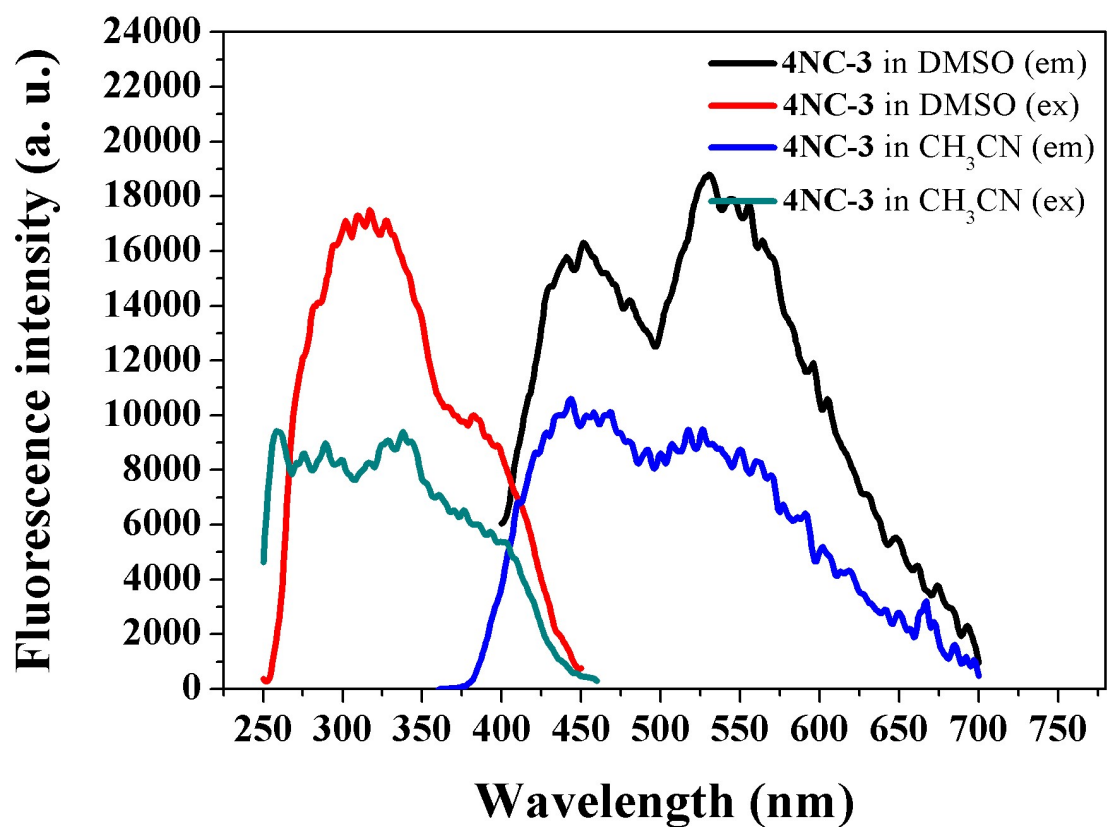

Figure S18. Fluorescence spectra of compound 4NC-3 in solutions (50  $\mu\text{M}$ ).

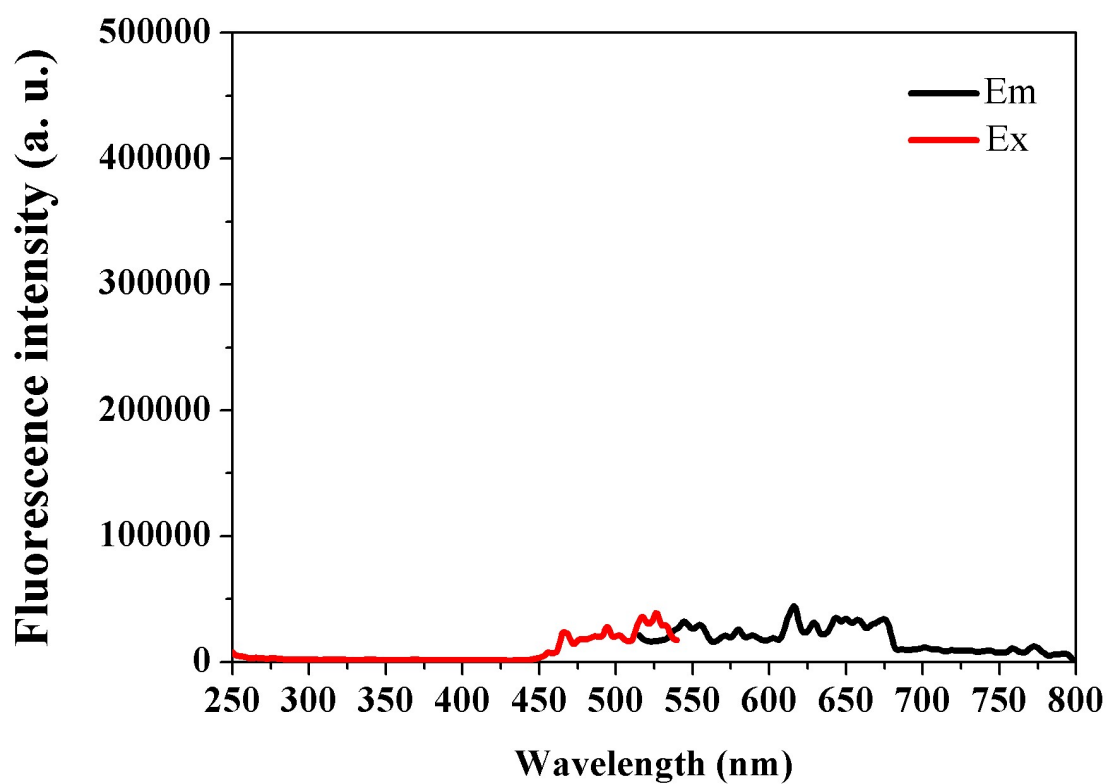

Figure S19. Fluorescence spectra of compound 4CN in solid.

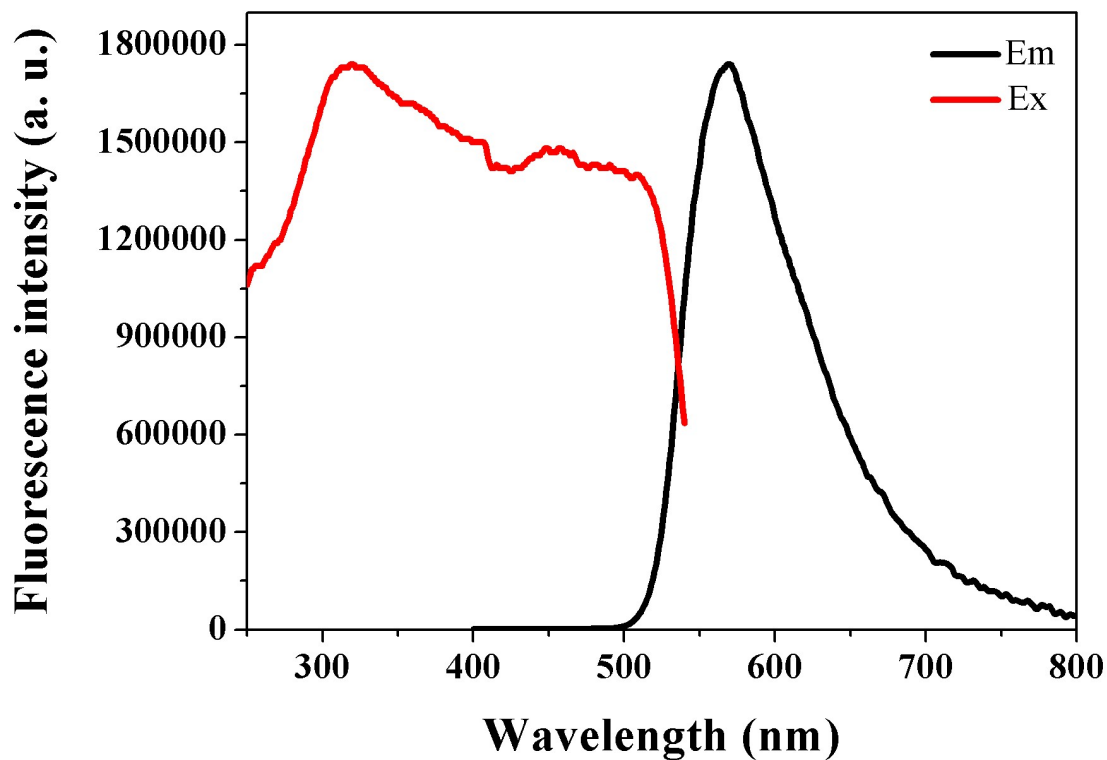

Figure S20. Fluorescence spectra of compound 4NC in solid.

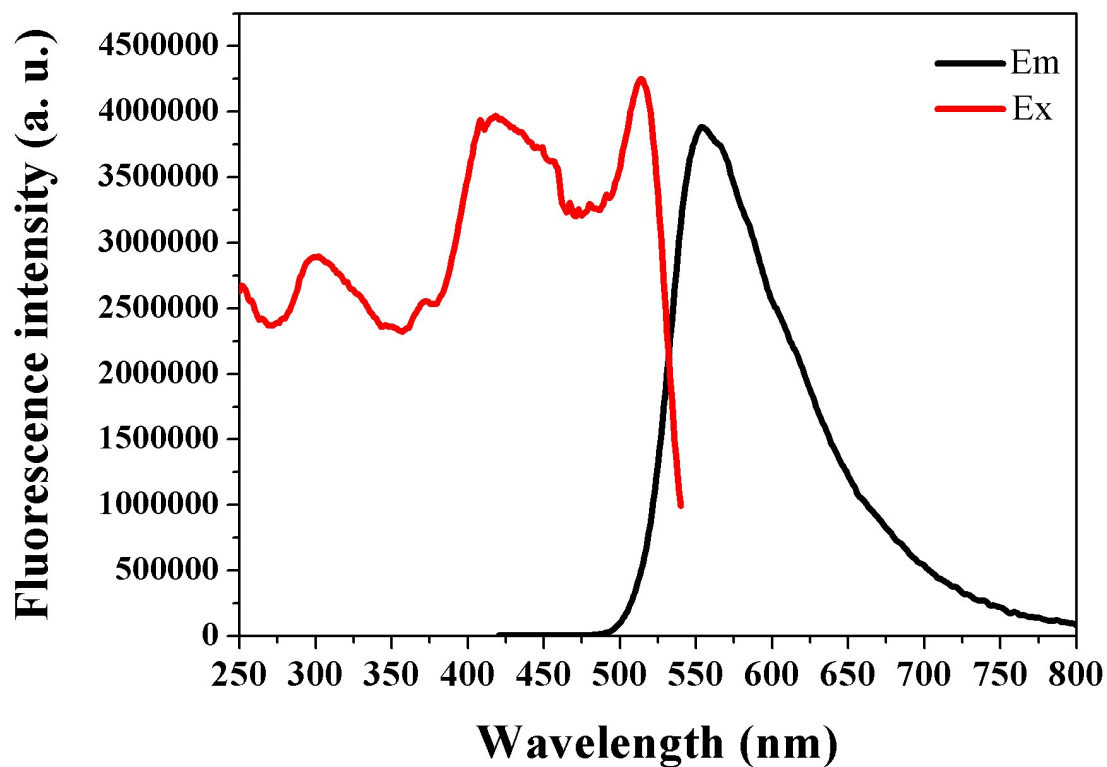

Figure S21. Fluorescence spectra of compound 5NC in solid.

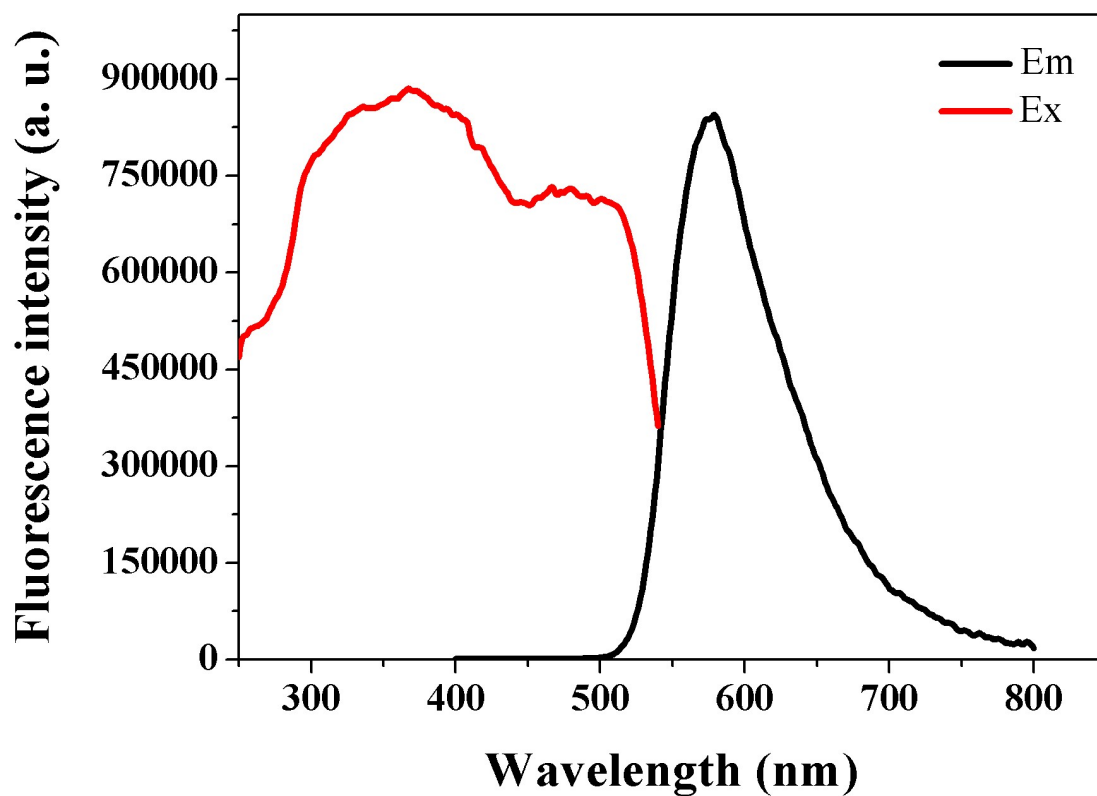

Figure S21. Fluorescence spectra of compound 6NC in solid.

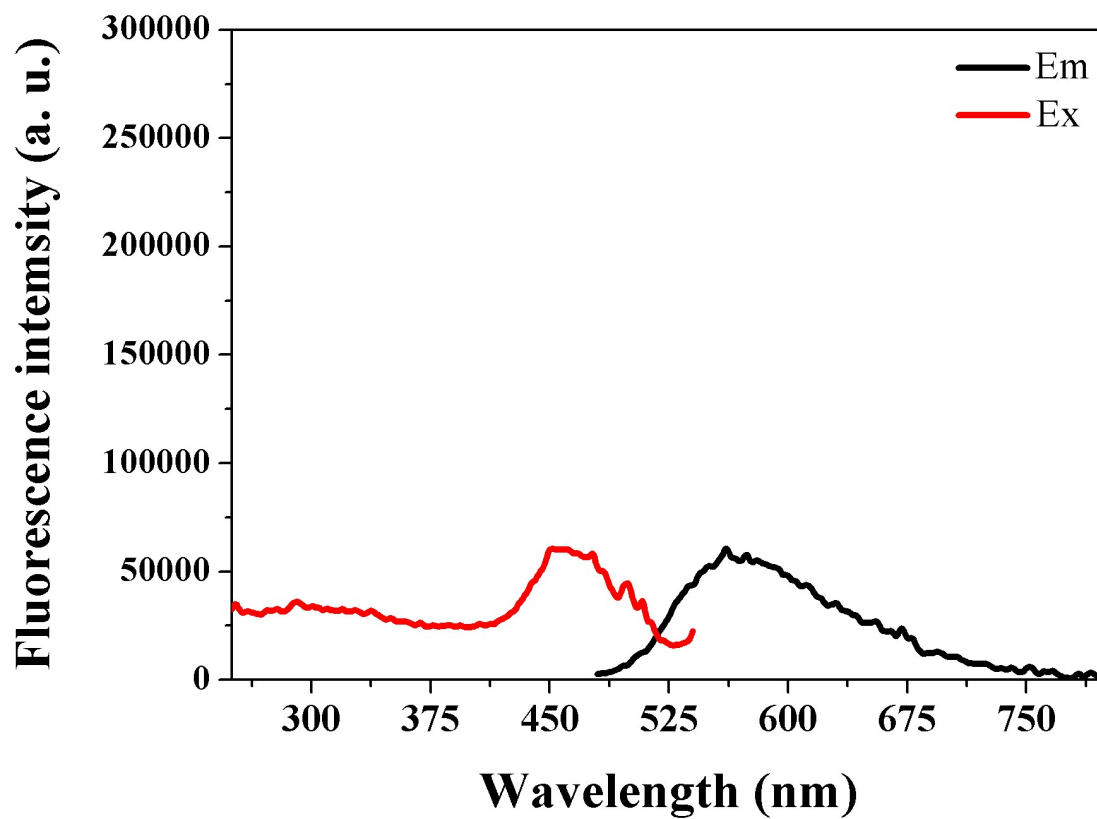

Figure S22. Fluorescence spectra of compound 7NC in solid.

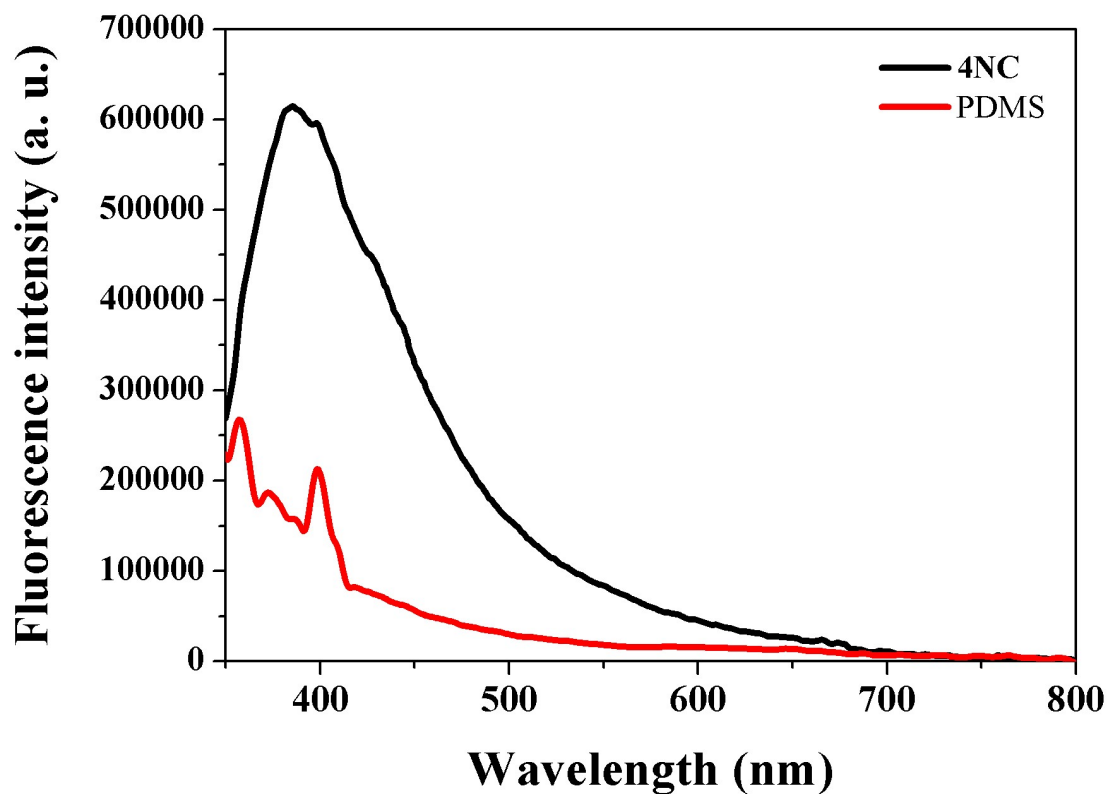

Figure S23. Fluorescence spectra of compound 4NC-PDMS and pure PDMS films.

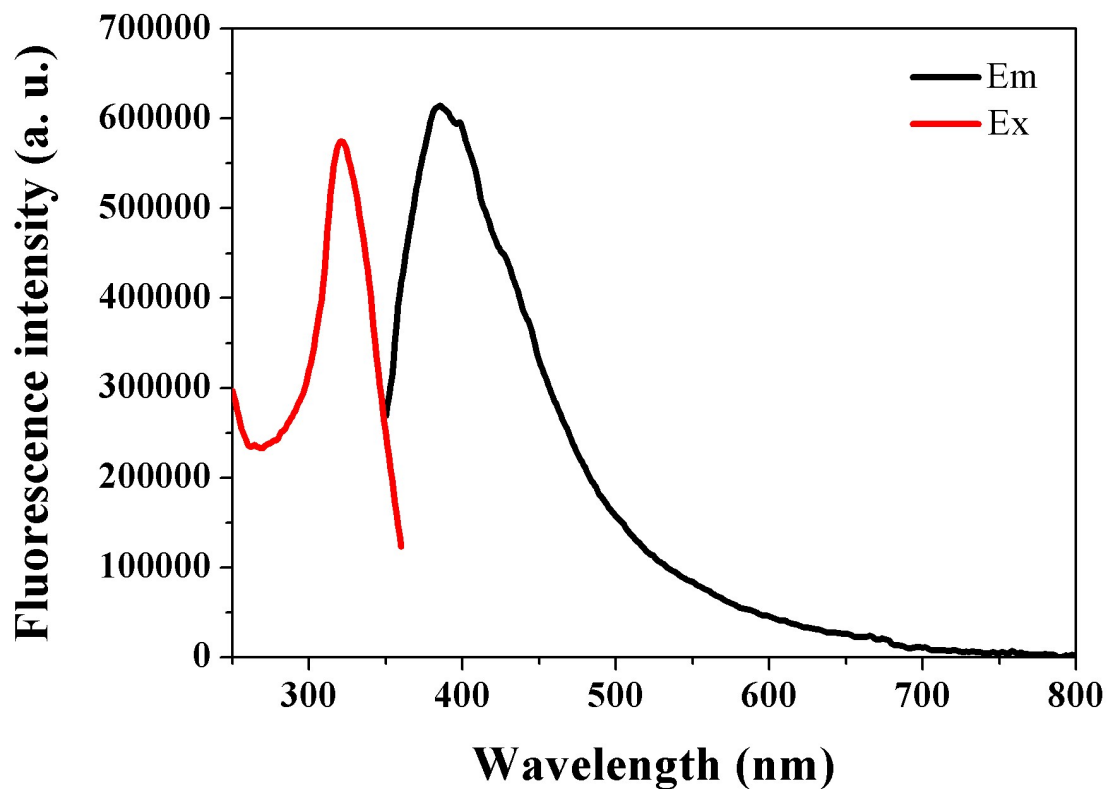

Figure S24. Ex and Em fluorescence spectra of 4NC-PDMS film.

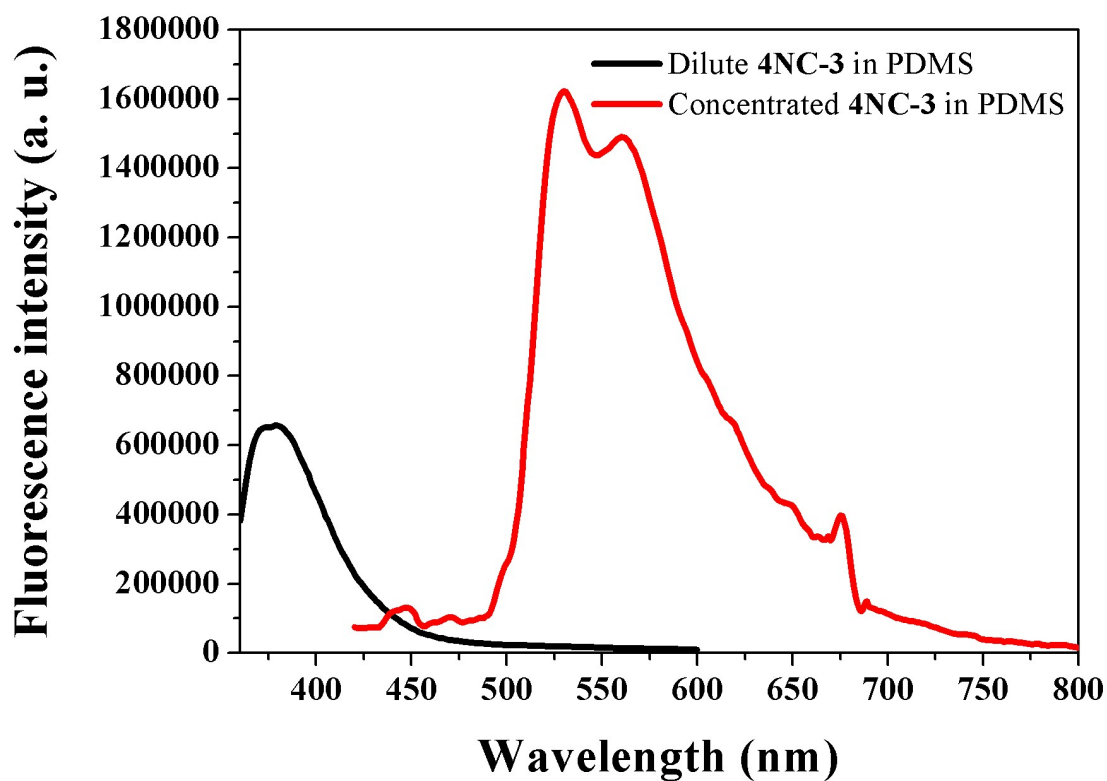

Figure S25. Fluorescence spectra of dilute and concentrate 4NC-3-PDMS films.

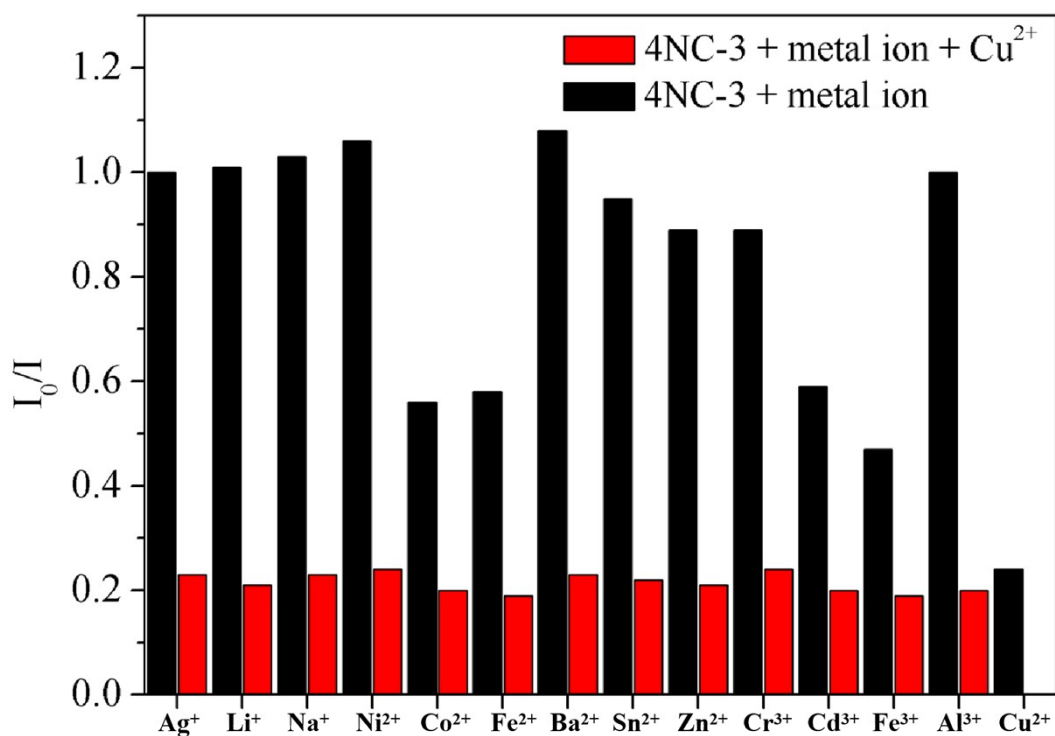

Figure S26. Fluorescence intensity changes of 4NC-3 (50  $\mu\text{M}$ ) upon addition of metal ions (250  $\mu\text{M}$ ) and  $\text{Cu}^{2+}$  (50  $\mu\text{M}$ ).

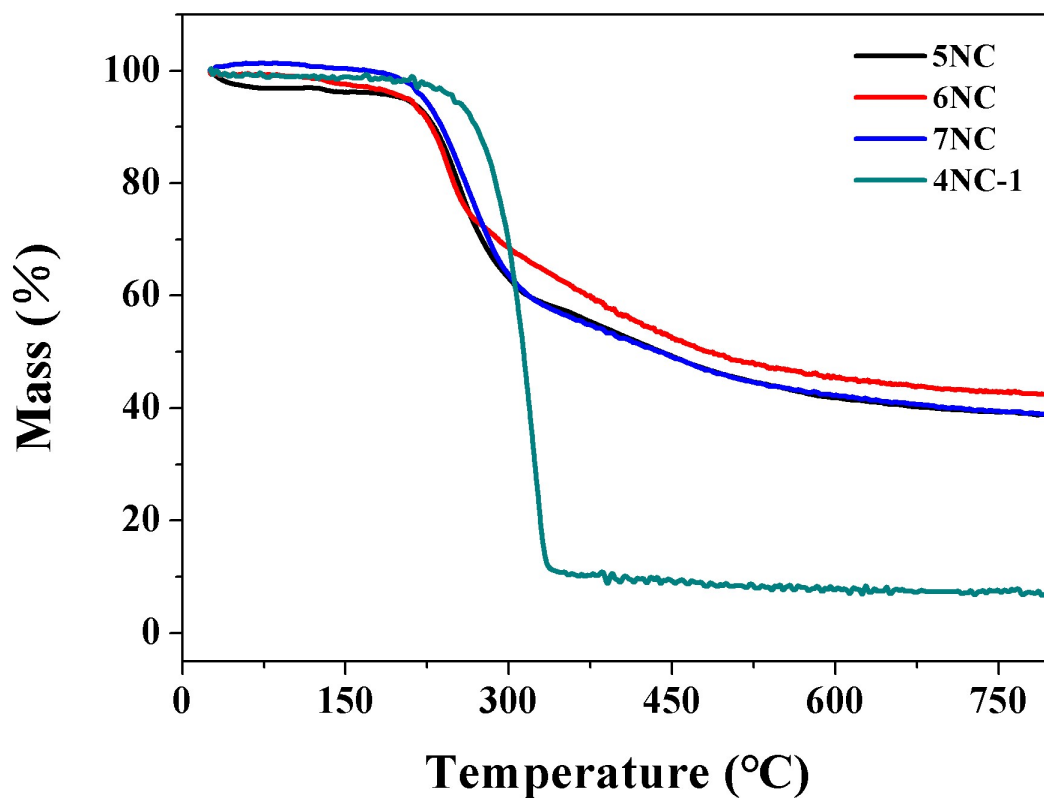

Figure S27. The TGA curves of title compounds 5NC, 6NC, 7NC, and 4NC-1.

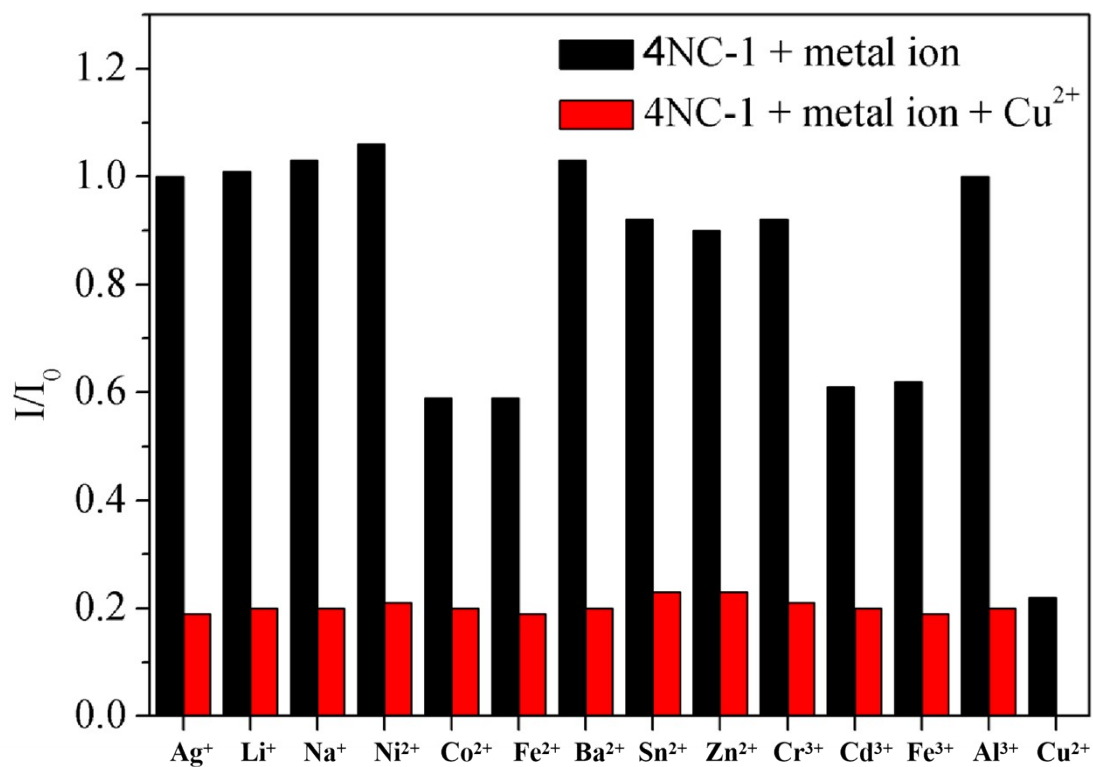

Figure S28. Fluorescence spectra of anti-interference effect of 4NC-1

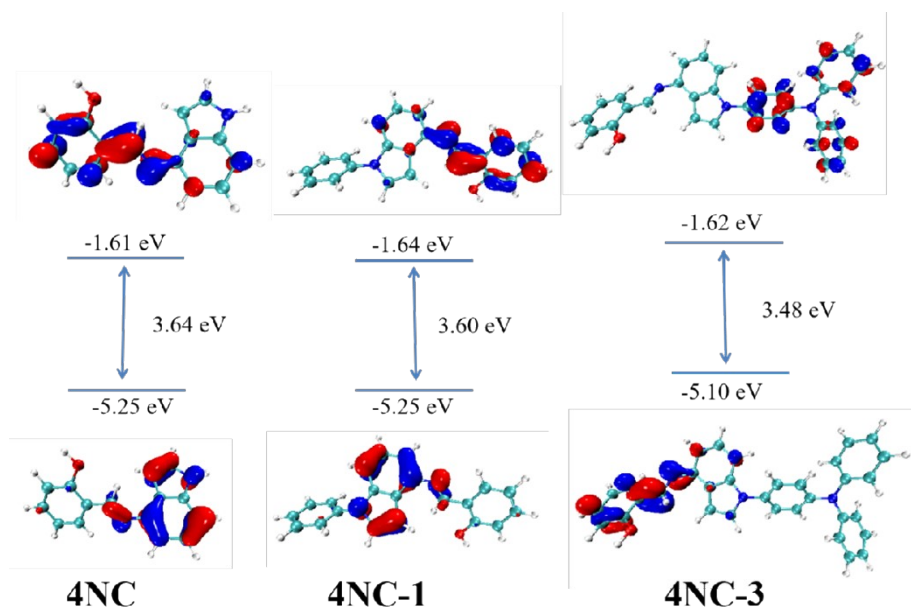

Figure S29. The HOMO and LUMO orbitals of 4NC, 4NC-1, and 4NC-3.

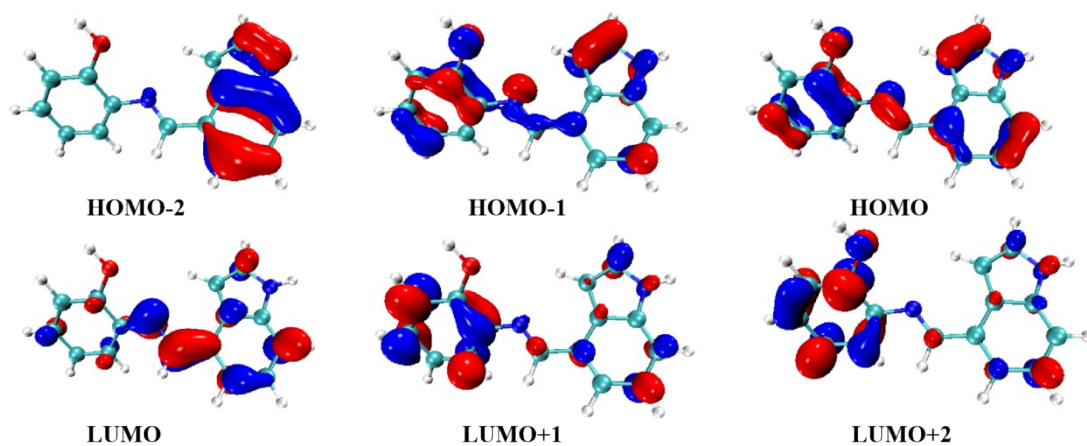

Frontier MOs of 4CN.

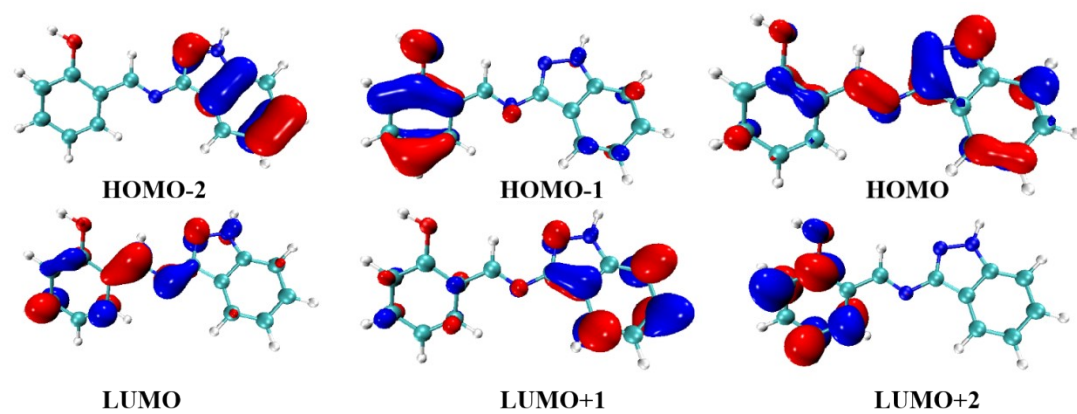

Frontier MOs of 3NC.



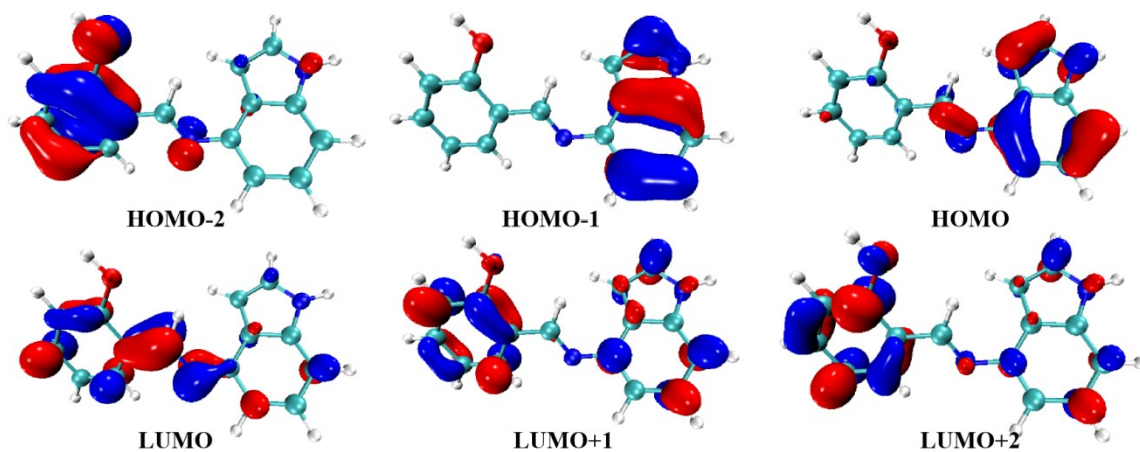

Frontier MOs of 4NC.

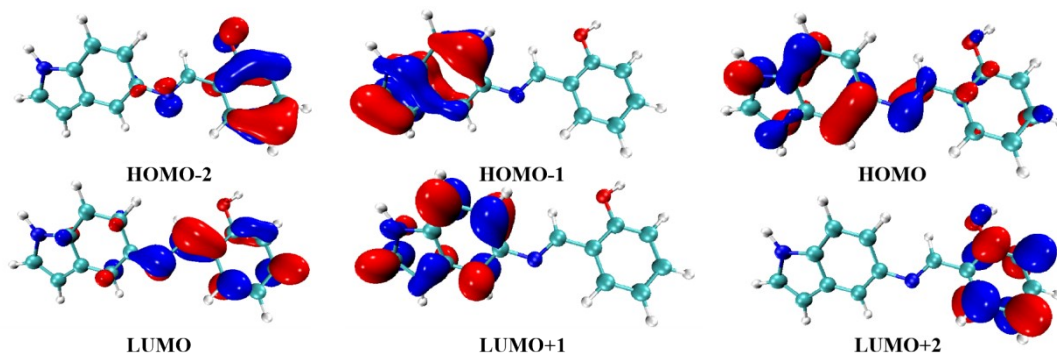

Frontier MOs of 5NC.

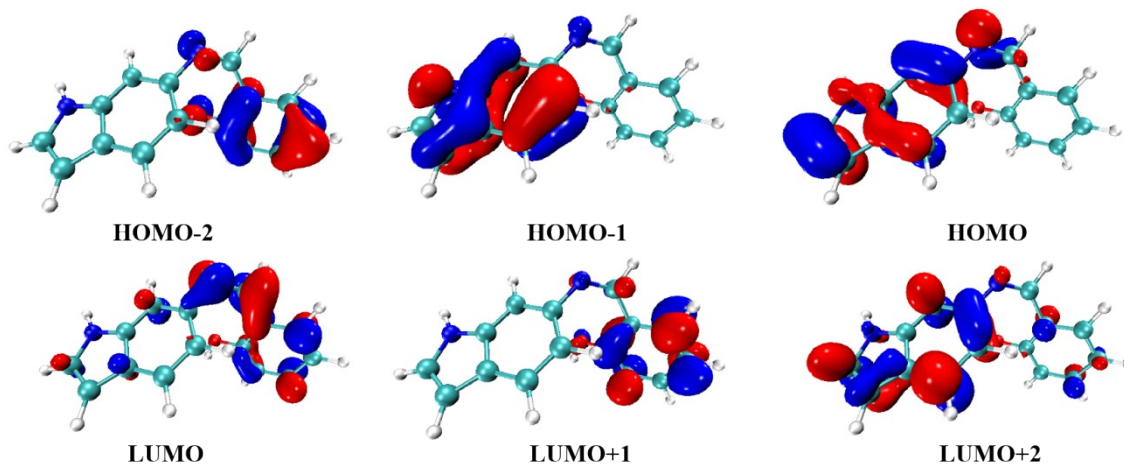

Frontier MOs of 6NC.

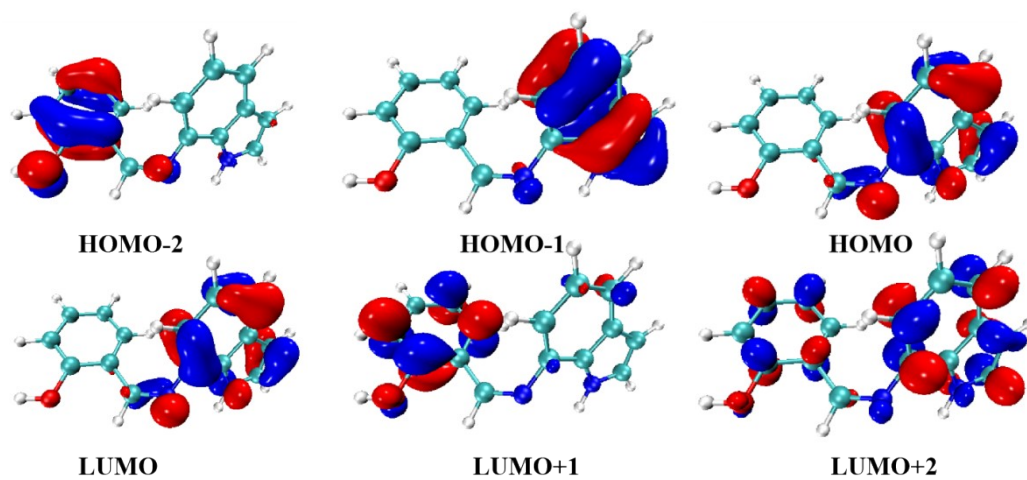

Frontier MOs of 7NC.

Table S5. Orbital energy of 4CN and 3NC-7NC (eV)

| Comp. | HOMO-2 | HOMO-1 | HOMO  | LUMO  | LUMO+1 | LUMO+2 |
|-------|--------|--------|-------|-------|--------|--------|
| 4CN   | -6.27  | -5.93  | -5.46 | -1.59 | -0.06  | 0.21   |
| 3NC   | -6.38  | -5.76  | -5.41 | -1.48 | -0.37  | 0.02   |
| 4NC   | -6.35  | -6.04  | -5.25 | -1.61 | -0.16  | 0.07   |
| 5NC   | -6.36  | -5.87  | -5.21 | -1.33 | -0.24  | -0.12  |
| 6NC   | -6.65  | -6.47  | -5.63 | -1.78 | -0.69  | -0.05  |
| 7NC   | -6.51  | -5.90  | -5.25 | -1.63 | -0.27  | -0.13  |

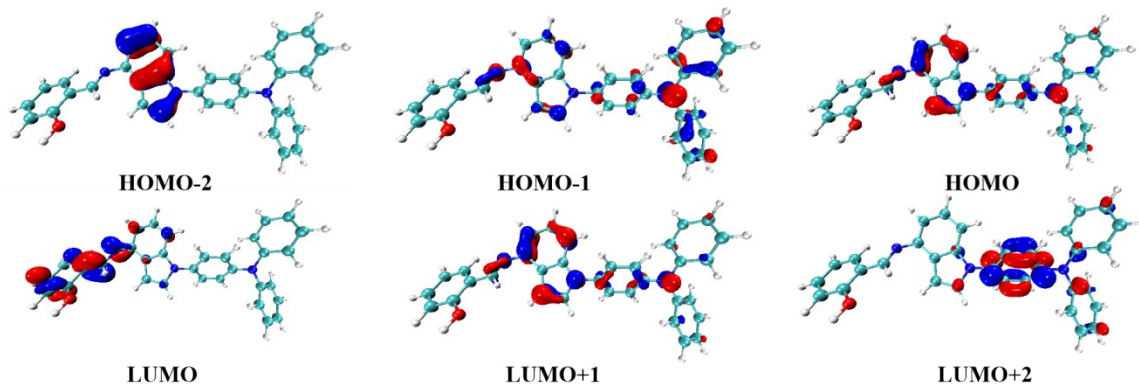

Frontier MOs of 4NC-3.

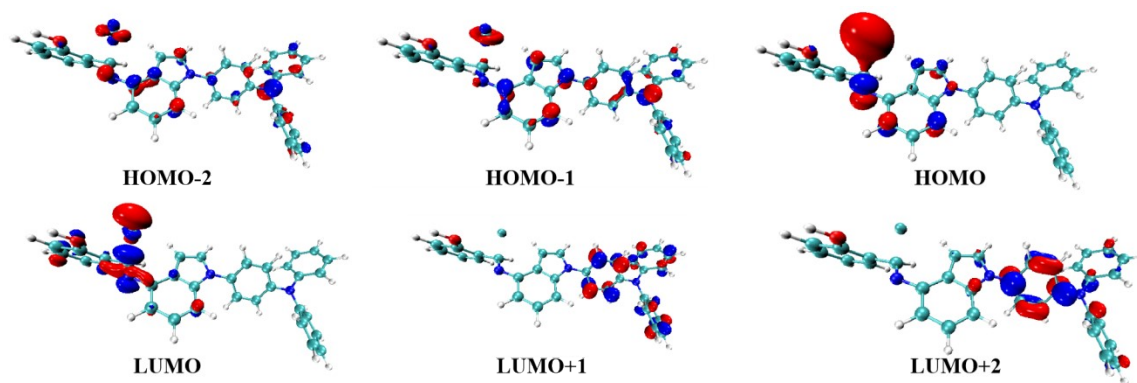

Frontier MOs of 4NC-3-Cu<sup>2+</sup>.

Table S6. Orbital energy of 4NC-3 and 4NC-3-Cu<sup>2+</sup> (eV).

| Comp.                  | HOMO-2 | HOMO-1 | HOMO  | LUMO  | LUMO+1 | LUMO+2 |
|------------------------|--------|--------|-------|-------|--------|--------|
| 4NC-3                  | -6.05  | -5.45  | -5.09 | -1.62 | -0.88  | -0.84  |
| 4NC-3-Cu <sup>2+</sup> | -5.41  | -5.20  | -3.89 | -1.44 | -0.88  | -0.84  |

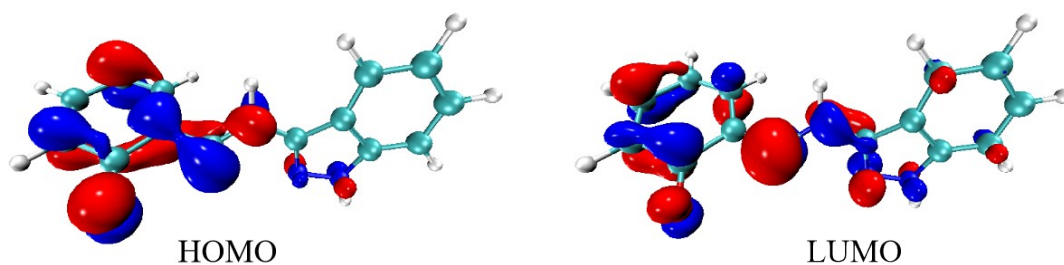

HOMO and LUMO orbitals of 3NC.

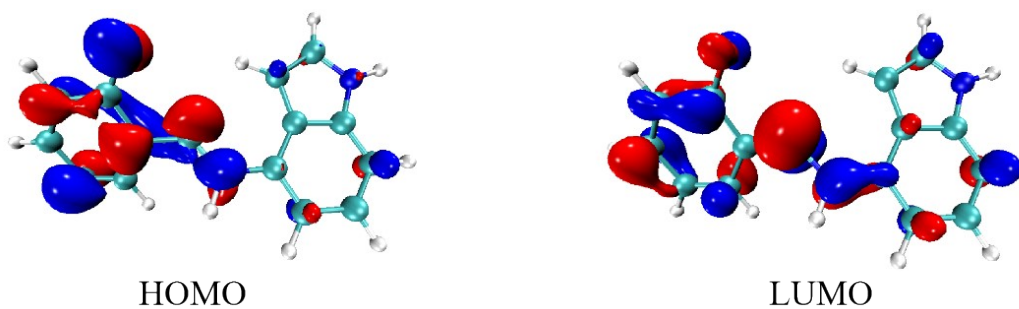

HOMO and LUMO orbitals of 4NC.

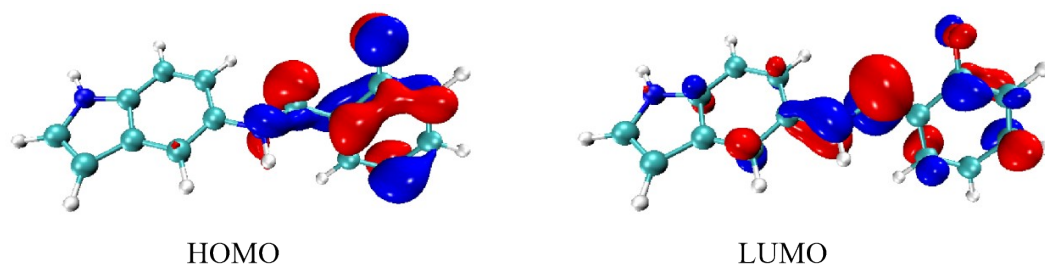

HOMO and LUMO orbitals of 5NC.

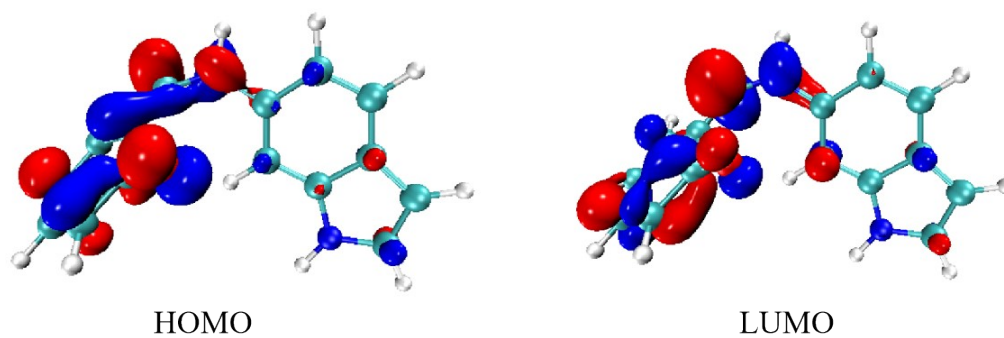

HOMO and LUMO orbitals of **6NC**.

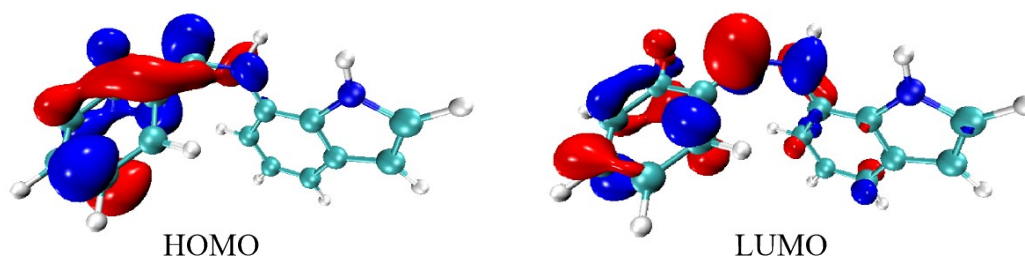

HOMO and LUMO orbitals of **7NC**.

Table S7. Energy gap differences of **3NC-7NC** (enolate forms) between HOMO and LUMO.

| Comp.      | <b>3NC</b> | <b>4NC</b> | <b>5NC</b> | <b>6NC</b> | <b>7NC</b> |
|------------|------------|------------|------------|------------|------------|
| Energy gap | 3.16       | 3.15       | 3.42       | 3.10       | 3.25       |

XYZ coordinates optimized molecular geometry of **4CN**.

|   |             |             |             |
|---|-------------|-------------|-------------|
| C | 3.53721812  | 0.22468122  | -0.09219250 |
| C | 2.11585534  | 0.27566931  | -0.09083215 |
| C | 1.39556368  | -0.91322066 | 0.18667155  |
| C | 2.12501963  | -2.07600943 | 0.45209756  |
| C | 3.52651810  | -2.09634537 | 0.44165167  |
| C | 4.25294497  | -0.94491532 | 0.16798083  |
| C | 1.74403615  | 1.62633042  | -0.38614938 |
| H | 1.58584519  | -2.99218869 | 0.66976715  |
| H | 4.04888567  | -3.02252724 | 0.65049497  |
| H | 5.33750997  | -0.95676640 | 0.15985888  |
| H | 0.73822288  | 2.00240529  | -0.44928798 |
| N | 3.98922414  | 1.49381444  | -0.38061183 |
| H | 4.95433204  | 1.76761157  | -0.44877975 |
| C | 2.90579539  | 2.33185916  | -0.55410791 |
| H | 3.05422245  | 3.37520821  | -0.78500038 |
| C | -2.21225300 | -0.15861522 | -0.10043466 |
| C | -3.02031594 | 0.88963656  | 0.39441946  |
| C | -2.84689269 | -1.26984839 | -0.67135779 |

|   |             |             |             |
|---|-------------|-------------|-------------|
| C | -4.40863918 | 0.78868260  | 0.33580698  |
| C | -4.23499081 | -1.36189089 | -0.73837596 |
| H | -2.23123221 | -2.05053615 | -1.10330212 |
| C | -5.01759679 | -0.33126693 | -0.22830440 |
| H | -5.01634239 | 1.59755372  | 0.73258030  |
| H | -4.69825887 | -2.22675166 | -1.19851112 |
| H | -6.09901090 | -0.38650788 | -0.27503234 |
| O | -2.38831276 | 1.96789341  | 0.94031371  |
| H | -3.05356331 | 2.60688591  | 1.21614200  |
| N | -0.82323113 | 0.00697378  | -0.06425197 |
| C | -0.06222632 | -0.98443331 | 0.20633421  |
| H | -0.47627941 | -1.96493406 | 0.48336220  |

XYZ coordinates optimized molecular geometry of **3NC**.

|   |             |             |             |
|---|-------------|-------------|-------------|
| C | 3.40815009  | 0.73169451  | -0.10494737 |
| C | 2.41487865  | -0.26727010 | -0.00215195 |
| C | 4.12985450  | -1.89660723 | 0.34437738  |
| C | 5.11130344  | -0.88556102 | 0.23793057  |
| C | 4.77375699  | 0.43800737  | 0.01356576  |
| C | 1.17353670  | 0.43429174  | -0.17477605 |
| N | 2.73096471  | 1.90119480  | -0.32163146 |
| H | 3.10911133  | 2.81358621  | -0.51327874 |
| C | 2.78337689  | -1.60010814 | 0.22790764  |
| H | 2.02465699  | -2.36899725 | 0.30794704  |
| H | 4.44468540  | -2.91878964 | 0.51950295  |
| H | 6.15706148  | -1.15515035 | 0.33476169  |
| H | 5.53262942  | 1.20781421  | -0.06559563 |
| N | 1.38739839  | 1.72795323  | -0.37675296 |
| N | -0.07430594 | -0.17302370 | -0.16099573 |
| C | -1.12587991 | 0.54250819  | 0.01085745  |
| H | -1.06315706 | 1.61740249  | 0.18721192  |
| C | -2.46498315 | -0.04561343 | -0.02153780 |
| C | -3.59875095 | 0.75603383  | 0.22037157  |
| C | -2.66139184 | -1.40884489 | -0.29153532 |
| C | -4.87825832 | 0.19738004  | 0.18883909  |
| C | -3.93051932 | -1.96602329 | -0.32155226 |
| H | -1.77992590 | -2.00974933 | -0.47751543 |
| C | -5.04255592 | -1.15642257 | -0.08028673 |
| H | -5.74267612 | 0.82779886  | 0.37730450  |
| H | -4.05912677 | -3.02083463 | -0.53257460 |
| H | -6.04108536 | -1.57812709 | -0.10210667 |
| O | -3.39941401 | 2.08032619  | 0.48451999  |
| H | -4.25036857 | 2.50877662  | 0.62147224  |

XYZ coordinates optimized molecular geometry of **4NC**.

|   |             |             |             |
|---|-------------|-------------|-------------|
| C | 3.53639722  | 0.21978832  | -0.01175363 |
| C | 2.12510092  | 0.26765251  | -0.18310871 |
| C | 1.37922354  | -0.92369074 | 0.01895644  |
| C | 2.07885167  | -2.08738415 | 0.34384615  |
| C | 3.46802452  | -2.09235380 | 0.53046725  |
| C | 4.22137598  | -0.94023687 | 0.35717009  |
| C | 1.80631420  | 1.60707308  | -0.59825347 |
| H | 1.50682023  | -2.99905215 | 0.46548485  |
| H | 3.96127751  | -3.01763624 | 0.80550261  |
| H | 5.29782136  | -0.94478689 | 0.48673037  |
| H | 0.83516204  | 2.00822219  | -0.83501022 |
| N | 4.02480415  | 1.47836473  | -0.29335200 |
| H | 4.99487601  | 1.74202929  | -0.27161078 |
| C | 2.98119263  | 2.30530666  | -0.65386661 |
| H | 3.16205097  | 3.33434699  | -0.92174440 |
| C | -2.24338879 | -0.17375003 | 0.03728093  |
| C | -3.07969942 | 0.88436633  | 0.44290815  |
| C | -2.83720647 | -1.30163032 | -0.54809403 |
| C | -4.46213708 | 0.80089908  | 0.26651449  |
| C | -4.21021147 | -1.38788513 | -0.72441252 |
| H | -2.17893566 | -2.10487753 | -0.85535099 |
| C | -5.02429367 | -0.33054748 | -0.31398312 |
| H | -5.09387804 | 1.62552620  | 0.58464850  |
| H | -4.64781965 | -2.26936331 | -1.17749014 |
| H | -6.09906641 | -0.38418829 | -0.44571129 |
| O | -2.49167837 | 1.98354097  | 1.00475594  |
| H | -3.17320382 | 2.61933131  | 1.24494541  |
| N | -0.00983366 | -1.03185036 | -0.13250770 |
| C | -0.79136887 | -0.08498355 | 0.22763712  |
| H | -0.42552045 | 0.82077669  | 0.71472517  |

XYZ coordinates optimized molecular geometry of **5NC**.

|   |             |             |             |
|---|-------------|-------------|-------------|
| C | -3.72981944 | 0.59126554  | 0.17632889  |
| C | -3.34298838 | -0.72253185 | -0.20287647 |
| C | -1.03788592 | -0.11071690 | 0.19199247  |
| C | -1.45826180 | 1.18819642  | 0.58189882  |
| C | -2.79507687 | 1.54708386  | 0.58262541  |
| C | -4.54816464 | -1.43166138 | -0.53378676 |
| H | -0.71932370 | 1.90325444  | 0.92242879  |
| H | -3.10172786 | 2.53713053  | 0.90282567  |
| H | -4.62877271 | -2.45507322 | -0.86452695 |
| N | -5.10320489 | 0.65751379  | 0.07762222  |
| H | -5.66522166 | 1.46605949  | 0.28109075  |

|   |             |             |             |
|---|-------------|-------------|-------------|
| C | -5.58891647 | -0.56350472 | -0.35218525 |
| H | -6.64803648 | -0.71102312 | -0.49416450 |
| C | -1.98612347 | -1.06615654 | -0.17187729 |
| H | -1.64551638 | -2.05979779 | -0.43747714 |
| N | 0.30876094  | -0.51836914 | 0.18997897  |
| C | 1.24894936  | 0.31799183  | -0.03760795 |
| H | 1.05558003  | 1.36469101  | -0.28788768 |
| C | 2.66051224  | -0.08024275 | 0.00409204  |
| C | 3.04132636  | -1.39115469 | 0.32633064  |
| C | 3.67374079  | 0.85491440  | -0.28305747 |
| C | 4.37503027  | -1.77060901 | 0.36272421  |
| H | 2.24965787  | -2.09704748 | 0.54506767  |
| C | 5.01717869  | 0.47676263  | -0.24555619 |
| C | 5.36603257  | -0.83034597 | 0.07540799  |
| H | 4.64560174  | -2.78928668 | 0.61366807  |
| H | 5.78662450  | 1.21044266  | -0.46941013 |
| H | 6.41258006  | -1.11221398 | 0.10112519  |
| O | 3.29567871  | 2.13173894  | -0.59507527 |
| H | 4.08103300  | 2.65919490  | -0.77206443 |

XYZ coordinates optimized molecular geometry of **6NC**.

|   |             |             |             |
|---|-------------|-------------|-------------|
| C | -2.77718434 | 0.37241901  | -0.24958331 |
| C | -2.67294880 | -0.67322517 | 0.70759691  |
| C | -0.48102397 | 0.15380632  | 1.26771379  |
| C | -0.59665694 | 1.18191428  | 0.29774855  |
| C | -1.76898470 | 1.31377275  | -0.44485184 |
| C | -3.89852059 | -1.41871261 | 0.64853221  |
| H | -1.85998082 | 2.12740101  | -1.15443399 |
| H | -4.16432001 | -2.28049537 | 1.24055727  |
| N | -4.01153832 | 0.24781413  | -0.85335269 |
| H | -4.37542245 | 0.85771410  | -1.56507885 |
| C | -4.68221225 | -0.83114148 | -0.30633667 |
| H | -5.67180727 | -1.09061778 | -0.64834565 |
| C | -1.50225231 | -0.75465024 | 1.47918375  |
| H | -1.39828306 | -1.52174686 | 2.23917191  |
| H | 0.41875861  | 0.10303028  | 1.86781538  |
| N | 0.39169253  | 2.16628659  | 0.12540614  |
| C | 1.64139582  | 1.93485425  | 0.03427766  |
| H | 2.27793134  | 2.82493417  | 0.02583010  |
| C | 2.41120794  | 0.66390074  | -0.04175135 |
| C | 2.05860161  | -0.42032244 | -0.86731935 |
| C | 3.59843784  | 0.56983516  | 0.69635610  |
| C | 2.84469852  | -1.57477956 | -0.88224622 |
| C | 4.38112595  | -0.57895636 | 0.68823871  |

|   |            |             |             |
|---|------------|-------------|-------------|
| H | 3.89425079 | 1.41844714  | 1.30513675  |
| C | 3.99334728 | -1.65828243 | -0.10283762 |
| H | 2.55680974 | -2.40491546 | -1.52104730 |
| H | 5.28321311 | -0.63038807 | 1.28568637  |
| H | 4.59073010 | -2.56254999 | -0.12717627 |
| O | 0.96440341 | -0.28704282 | -1.66295700 |
| H | 0.77762687 | -1.12576896 | -2.09716179 |

XYZ coordinates optimized molecular geometry of **7NC**.

|   |             |             |             |
|---|-------------|-------------|-------------|
| C | 2.24906837  | -0.44257244 | -0.01606573 |
| C | 3.20218346  | 0.60287312  | 0.06746471  |
| C | 1.70672509  | 1.74742107  | 1.55743238  |
| C | 0.76515675  | 0.70817023  | 1.44730225  |
| C | 1.00798007  | -0.40462338 | 0.64148423  |
| C | 4.32045912  | 0.19819666  | -0.73918022 |
| H | 5.23098607  | 0.75086026  | -0.90998071 |
| N | 2.76326224  | -1.41715588 | -0.83825661 |
| H | 2.32291682  | -2.30804804 | -0.99644634 |
| C | 4.02030537  | -1.03257112 | -1.25929681 |
| H | 4.60200869  | -1.67279745 | -1.90384582 |
| C | 2.91172753  | 1.71884988  | 0.87147346  |
| H | 3.62279286  | 2.53144955  | 0.96845057  |
| H | 1.47692257  | 2.58958676  | 2.20081822  |
| H | -0.16013747 | 0.75803622  | 2.00836430  |
| N | 0.18554534  | -1.54084643 | 0.55515076  |
| C | -1.06953117 | -1.52265293 | 0.31400476  |
| H | -1.57240963 | -2.48605928 | 0.40346243  |
| C | -1.96518494 | -0.42410420 | -0.11477136 |
| C | -3.33680995 | -0.51582412 | 0.19501490  |
| C | -1.54321071 | 0.64588020  | -0.91759189 |
| C | -4.23879381 | 0.44312069  | -0.26878285 |
| C | -2.43898825 | 1.59634628  | -1.38911867 |
| H | -0.49622239 | 0.72068235  | -1.17906959 |
| C | -3.78989728 | 1.49593256  | -1.05741545 |
| H | -5.29023373 | 0.36098232  | -0.00836377 |
| H | -2.08749146 | 2.40970921  | -2.01204553 |
| H | -4.49742353 | 2.23558549  | -1.41442016 |
| O | -3.73812283 | -1.56609918 | 0.97055077  |
| H | -4.69551690 | -1.54183279 | 1.06868887  |

XYZ coordinates optimized molecular geometry of **4NC-3**.

|   |             |            |             |
|---|-------------|------------|-------------|
| C | -1.63729310 | 0.97594583 | -0.25172089 |
| C | -2.97672736 | 0.50140301 | -0.30311794 |
| C | -4.03341167 | 1.44399621 | -0.39755809 |



|   |              |             |             |
|---|--------------|-------------|-------------|
| C | -3.69895470  | 2.79654367  | -0.48014252 |
| C | -2.36960854  | 3.23329421  | -0.42079771 |
| C | -1.31723903  | 2.33521332  | -0.30777026 |
| C | -2.90751122  | -0.93358150 | -0.31346409 |
| H | -4.50758977  | 3.50971141  | -0.58355260 |
| H | -2.15876125  | 4.29515133  | -0.47732374 |
| H | -0.29029087  | 2.67588767  | -0.29017226 |
| H | -3.72723356  | -1.63136888 | -0.35078998 |
| N | -0.79803400  | -0.13458077 | -0.20882697 |
| C | -1.58735610  | -1.27519517 | -0.25970475 |
| H | -1.12467855  | -2.24827604 | -0.21927729 |
| C | -7.28709606  | -0.23669859 | 0.12330284  |
| C | -7.78881287  | -1.30274537 | 0.89492791  |
| C | -8.17203573  | 0.43889335  | -0.72984800 |
| C | -9.13397112  | -1.66656543 | 0.80857459  |
| C | -9.50894760  | 0.08028251  | -0.81758604 |
| H | -7.76870736  | 1.25485202  | -1.31676703 |
| C | -9.98969656  | -0.97745793 | -0.04346166 |
| H | -9.50591763  | -2.49117539 | 1.41021710  |
| H | -10.17534146 | 0.61696373  | -1.48215922 |
| H | -11.03229507 | -1.26886530 | -0.10202548 |
| O | -6.91728043  | -1.96091627 | 1.71741764  |
| H | -7.38973110  | -2.65278909 | 2.19124423  |
| N | -5.39291276  | 1.11079214  | -0.46978941 |
| C | -5.87406072  | 0.14603510  | 0.21920204  |
| H | -5.26947974  | -0.42240469 | 0.92863177  |
| C | 0.62033159   | -0.13488372 | -0.15333684 |
| C | 1.30030367   | 0.63435226  | 0.79512007  |
| C | 1.35810382   | -0.92836201 | -1.03596976 |
| C | 2.68738102   | 0.61209211  | 0.85708723  |
| H | 0.73782760   | 1.22699907  | 1.50587462  |
| C | 2.74527425   | -0.95310328 | -0.97320462 |
| H | 0.84158204   | -1.50533887 | -1.79399533 |
| C | 3.43334603   | -0.18164601 | -0.02615799 |
| H | 3.20028744   | 1.20289524  | 1.60571444  |
| H | 3.30381416   | -1.56295860 | -1.67221494 |
| N | 4.84919501   | -0.20313745 | 0.03760247  |
| C | 5.57073431   | 1.00144817  | 0.26574368  |
| C | 6.65177204   | 1.02385647  | 1.15721545  |
| C | 5.21354764   | 2.18284367  | -0.39824977 |
| C | 7.36088892   | 2.20137377  | 1.37107300  |
| H | 6.93155351   | 0.11580986  | 1.67722471  |
| C | 5.91751940   | 3.35974656  | -0.16479130 |
| H | 4.38436717   | 2.17235743  | -1.09516210 |

|   |            |             |             |
|---|------------|-------------|-------------|
| C | 6.99697262 | 3.37698222  | 0.71676329  |
| H | 8.19465345 | 2.20122027  | 2.06441401  |
| H | 5.62798404 | 4.26483532  | -0.68714157 |
| H | 7.54736681 | 4.29404805  | 0.89106323  |
| C | 5.55252215 | -1.42802875 | -0.12844097 |
| C | 6.71134195 | -1.48119205 | -0.91489015 |
| C | 5.10021066 | -2.59988485 | 0.49342880  |
| C | 7.40225942 | -2.67892434 | -1.06706381 |
| H | 7.06562924 | -0.58099815 | -1.40202831 |
| C | 5.78798909 | -3.79672519 | 0.32135450  |
| H | 4.21008412 | -2.56620066 | 1.10976034  |
| C | 6.94431620 | -3.84455505 | -0.45536662 |
| H | 8.29697649 | -2.70209385 | -1.67930063 |
| H | 5.42437648 | -4.69376371 | 0.81028595  |
| H | 7.48147514 | -4.77720468 | -0.58166123 |

XYZ coordinates optimized molecular geometry of **4NC-3-Cu<sup>2+</sup>**.

|   |              |             |             |
|---|--------------|-------------|-------------|
| C | -1.02581411  | 0.90608314  | -0.10096371 |
| C | -2.35799519  | 0.41286698  | -0.03987409 |
| C | -3.44633901  | 1.32538607  | -0.21934905 |
| C | -3.10954689  | 2.66612574  | -0.49793055 |
| C | -1.79092745  | 3.11510836  | -0.54924924 |
| C | -0.72119369  | 2.24739379  | -0.35002256 |
| C | -2.25702978  | -1.01230189 | 0.10908673  |
| H | -3.93300159  | 3.35084221  | -0.65879561 |
| H | -1.59460402  | 4.16117784  | -0.75607085 |
| H | 0.30186283   | 2.59267392  | -0.41800820 |
| H | -3.06542392  | -1.71915035 | 0.19209235  |
| N | -0.16312646  | -0.17962283 | 0.04231861  |
| C | -0.92742511  | -1.32929932 | 0.15626247  |
| H | -0.44671175  | -2.28341234 | 0.29994037  |
| C | -6.72446925  | -0.14225300 | 0.69784835  |
| C | -7.68011753  | 0.02168364  | -0.32422077 |
| C | -7.19631517  | -0.37825209 | 1.99304002  |
| C | -9.04225861  | -0.00949344 | -0.03687581 |
| C | -8.55655465  | -0.41671784 | 2.28776419  |
| H | -6.47009221  | -0.51464345 | 2.78788970  |
| C | -9.48280328  | -0.22077617 | 1.26809974  |
| H | -9.76173250  | 0.12004403  | -0.84094797 |
| H | -8.88818204  | -0.58770421 | 3.30510890  |
| H | -10.54596900 | -0.23834773 | 1.47850891  |
| O | -7.21638162  | 0.14704644  | -1.60817039 |
| H | -7.96495227  | 0.26864139  | -2.20247783 |
| N | -4.78694531  | 1.04347988  | -0.16998704 |

|    |             |             |             |
|----|-------------|-------------|-------------|
| C  | -5.25528832 | -0.06010451 | 0.44757463  |
| H  | -4.66239651 | -0.50376048 | 1.25853294  |
| C  | 1.25583086  | -0.15090479 | 0.04605056  |
| C  | 1.95265910  | 0.74186917  | 0.86545951  |
| C  | 1.97842055  | -1.03899528 | -0.75537117 |
| C  | 3.34108311  | 0.74779592  | 0.87968828  |
| H  | 1.40318104  | 1.41136428  | 1.51546942  |
| C  | 3.36710217  | -1.03468189 | -0.74062178 |
| H  | 1.44762285  | -1.71485485 | -1.41546902 |
| C  | 4.07185882  | -0.13957714 | 0.07636667  |
| H  | 3.86774758  | 1.43576971  | 1.52923478  |
| H  | 3.91324904  | -1.71952975 | -1.37719278 |
| N  | 5.48920180  | -0.13091553 | 0.09051031  |
| C  | 6.19374379  | 1.10416483  | 0.13186971  |
| C  | 7.30740911  | 1.25894742  | 0.96838818  |
| C  | 5.78695740  | 2.18376742  | -0.66383512 |
| C  | 7.99959015  | 2.46516151  | 0.99954427  |
| H  | 7.62564757  | 0.43060114  | 1.58950305  |
| C  | 6.47484814  | 3.39184375  | -0.61298635 |
| H  | 4.93201506  | 2.07020328  | -1.31920742 |
| C  | 7.58664150  | 3.54015820  | 0.21434246  |
| H  | 8.85901919  | 2.56798985  | 1.65275532  |
| H  | 6.14670268  | 4.21690863  | -1.23544100 |
| H  | 8.12412228  | 4.48058233  | 0.24643982  |
| C  | 6.21029941  | -1.35620589 | 0.05599839  |
| C  | 7.34048671  | -1.49342584 | -0.76131164 |
| C  | 5.80392150  | -2.44442156 | 0.84035895  |
| C  | 8.04873129  | -2.69048900 | -0.78484077 |
| H  | 7.65911777  | -0.65852920 | -1.37334363 |
| C  | 6.50831135  | -3.64317466 | 0.79716883  |
| H  | 4.93651040  | -2.34422011 | 1.48136847  |
| C  | 7.63629166  | -3.77391028 | -0.01109921 |
| H  | 8.92088938  | -2.77938493 | -1.42306299 |
| H  | 6.18054346  | -4.47470467 | 1.41122501  |
| H  | 8.18677771  | -4.70698398 | -0.03694845 |
| Cu | -5.06742938 | -1.30788837 | -1.06495842 |
